# UVB mutagenesis differs in *NRAS*- and *BRAF*-mutant mouse models of melanoma

Robert L. Bowman<sup>1\*</sup>, Rebecca C. Hennessey<sup>2\*</sup>, David A. Tallman<sup>2,3</sup>, Tirzah J. Weiss<sup>2,3</sup>, Emma R. Crawford<sup>3</sup>, Brandon M. Murphy<sup>2</sup>, Amy Webb<sup>4</sup>, Souhui Zhang<sup>2</sup>, Krista M. D. La Perle<sup>5</sup>, Craig J. Burd<sup>3</sup>, Ross L. Levine<sup>1</sup>, A. Hunter Shain<sup>6</sup> and Christin E. Burd<sup>2,3†</sup>

<sup>1</sup>Human Oncology and Pathogenesis Program, Memorial Sloan Kettering Cancer Center, New York, NY 10065

<sup>2</sup>Departments of Cancer Biology and Genetics, <sup>3</sup>Molecular Genetics, <sup>4</sup>Biomedical Informatics, and <sup>5</sup>Veterinary Biosciences, The Ohio State University, Columbus, Ohio, 43210

<sup>6</sup>Department of Dermatology, Helen Diller Family Comprehensive Cancer Center, University of California, San Francisco (UCSF), San Francisco, CA 94115

\*Authors contributed equally

†Address correspondence to:

Christin E. Burd, Ph.D.  
The Ohio State University  
Biomedical Research Tower, Rm 918  
460 W. 12<sup>th</sup> Avenue  
Columbus, Ohio 43210, USA  
Phone: (614)688-7569  
Fax: (614)292-6356  
Email: [burd.25@osu.edu](mailto:burd.25@osu.edu)

## **RUNNING TITLE**

Enhanced UVB carcinogenesis in BRAF-mutant murine melanoma

## **KEY WORDS**

Mutational signature, UVA, UVB, melanoma, carcinogenesis

1 **ABSTRACT**

2 *BRAF*-mutant melanomas are more likely than *NRAS*-mutant melanomas to arise in anatomical  
3 locations protected from chronic sun damage. We hypothesized that this discrepancy in tumor  
4 location is a consequence of the differential sensitivity of *BRAF* and *NRAS*-mutant melanocytes  
5 to ultraviolet light (UV)-mediated carcinogenesis. We tested this hypothesis by comparing the  
6 mutagenic consequences of a single, narrow band ultraviolet-A (UVA; 320-400nm) or ultraviolet-  
7 B (UVB; 280-320nm) exposure in mouse models predisposed to *Braf*- or *Nras*-mutant melanoma.  
8 Exposures approximated the amount of UVA or UVB energy contained in ~40 minutes of summer  
9 sunlight. Tumor onset was accelerated in all UVB-, but only half of UVA- irradiated mice as  
10 compared to unirradiated controls. Melanomas from both mouse models, harbored recurrent  
11 mutations affecting the RING domain of MAP3K1 and Actin-binding domain of Filamin A  
12 irrespective of UV status. Melanomas from UVB-irradiated, *Braf*-mutant mice averaged twice as  
13 many SNVs (1,025 vs. 435) and five times as many dipyrimidine variants (33.3 vs. 5.7) than  
14 tumors from similarly irradiated *Nras*-mutant mice. We identified a mutational signature enriched  
15 in UVB-accelerated tumors which mirrored COSMIC signatures associated with human skin  
16 cancer. Notably, this signature was enriched to a greater extent in *Braf*- than *Nras*-mutant murine  
17 melanomas. These data suggest that oncogenic BRAF may enhance UVB carcinogenesis to  
18 promote melanoma formation at anatomic sites with low or intermittent sun exposure.

## 19 INTRODUCTION

20 The most common genetic subtypes of human melanoma, *NRAS*- and *BRAF*-mutant, are  
21 enriched in different anatomical locations. *NRAS*-mutant melanomas preferentially localize to  
22 chronically sun-damaged (CSD) skin on the head and neck, whereas *BRAF*-mutant melanomas  
23 are more common in areas of intermittent sun exposure (Zhang et al. 2016). Despite the  
24 association of *NRAS*-mutant tumors with CSD skin, it is reported that UV signature lesions (C>T  
25 and CC>TT) are prevalent in a similar proportion of *NRAS*- and *BRAF*-mutant melanomas  
26 (Cancer Genome Atlas 2015). These observations led us to speculate that *BRAF*-mutant nevi  
27 could be more sensitive to UV mutagenesis and subsequent melanocyte transformation.  
28 However, it is difficult to control for differences in lifetime sun exposure among biopsies of human  
29 melanomas or nevi.

30 Genetically engineered mouse models (GEMMs) provide a controlled genetic background in  
31 which the genomic and phenotypic effects of UV exposures can be studied. GEMMs encoding a  
32 melanocyte-specific *Nras*- or *Braf*-mutation mimic the presence of these mutations in human  
33 benign nevi (Roh et al. 2015). Moreover, neonatal or chronic UV treatment accelerates the  
34 formation and progression of melanoma in a variety of melanoma GEMMs, consistent with human  
35 disease etiology (Mukhopadhyay et al. 2016; Chagani et al. 2017; Hennessey et al. 2017; Perez-  
36 Guijarro et al. 2017; Trucco et al. 2019). Genomic analyses of tumors from UV-treated *Nras* or  
37 *Braf*-mutant GEMMs have been reported (Viros et al. 2014; Mukhopadhyay et al. 2016; Trucco et  
38 al. 2019). However, no study has directly compared the mutational profiles of *Nras*- and *Braf*-  
39 driven mouse melanomas exposed to the same UV dosing scheme. Therefore, a complete  
40 understanding of how different oncogenic drivers cooperate with environmental mutagens to  
41 promote transformation is lacking.

42 Here, we used a single-dose UV irradiation scheme to characterize the phenotypic and  
43 genomic effects of narrow band UVA (360-390 nm) and UVB (280-320 nm) exposures in *Nras*-  
44 and *Braf*-mutant mouse models of melanoma. We exposed these animals to a single dose of UVA

45 or UVB, approximating the amount of energy from each band of the UV spectrum in 40 minutes  
46 of intense sunlight. Then, we monitored the mice for melanoma development. Tumors from these  
47 animals were sequenced to gain insight into the mutational consequences of each UV source in  
48 *Nras*- and *Braf*-mutant melanocytes.

## 49 RESULTS

### 50 UV exposure alters NRAS- and BRAF-mutant melanomagenesis

51 We generated melanocyte-specific, Tyr::CreER(T2)-driven, *Nras* (*TN*) and *Braf* (*TB*) mice to  
52 model the major genetic subtypes of human melanoma (Hodis et al. 2012) (**Figure 1A-B**). *TN*  
53 mice are homozygous for the *LSL-Nras*<sup>Q61R</sup> allele (Burd et al. 2014; Hennessey et al. 2017),  
54 whereas *TB* animals carry a heterozygous, conditional *Braf*<sup>V637E</sup> allele (*Braf*<sup>CA</sup>; (Dankort et al.  
55 2007). Notably, the *Braf*<sup>V637E</sup> allele is the murine equivalent of human *Braf*<sup>V600E</sup> (Rad et al. 2013).  
56 Oncogene expression is driven by the endogenous gene promoter in both models, and is  
57 activated by a melanocyte-specific, tamoxifen-inducible Cre recombinase (Tyr::CreER(T2);  
58 (Bosenberg et al. 2006)). Therefore, the expression of oncogenic *Nras* or *Braf* in these mice  
59 mimics the presence of *NRAS* and *BRAF* mutations in most benign human nevi (Roh et al. 2015).  
60 Mice carrying only the *Braf*<sup>CA</sup> allele rarely develop melanoma (Dankort et al. 2009). For this  
61 reason, *p16*<sup>INK4a</sup> conditional knockout alleles (*p16*<sup>L</sup>; (Monahan et al. 2010)) were included in both  
62 the *TN* and *TB* models. While *p16*<sup>INK4a</sup> loss-of-function is an early event observed in >60% of  
63 human melanomas, germline mutations affecting *p16*<sup>INK4a</sup> are insufficient to drive the disease in  
64 mice or humans (Bishop et al. 2000; Shain et al. 2015b; Hennessey et al. 2017).

65 *TN* and *TB* mice were topically treated with 4-hydroxytamoxifen (4OHT) on postnatal days  
66 one and two to induce Cre activity and stimulate recombination of the conditional *p16*<sup>INK4a</sup>  
67 knockout and *LSL-Nras*<sup>61R</sup> or *Braf*<sup>CA</sup> alleles. On postnatal day three, the mice were exposed to a  
68 single dose of ambient light (“No UV” or 0 kJ/m<sup>2</sup>), narrow band UVA or narrow band UVB  
69 irradiation. The amount of UVB delivered approximated that which is contained in 40 minutes of  
70 summer sunlight (4.5 kJ/m<sup>2</sup>), whereas the amount of UVA employed models a short, indoor  
71 tanning session (70 or 150 kJ/m<sup>2</sup>; see: **Methods**). These dosing schemes approximate sun  
72 exposures of a similar duration, as the UVB to UVA ratio in sunlight is ~1:20, but varies based on  
73 season, cloud cover and latitude (Cadet and Douki 2018). Neither dose of UVA or UVB caused  
74 erythema or blistering.

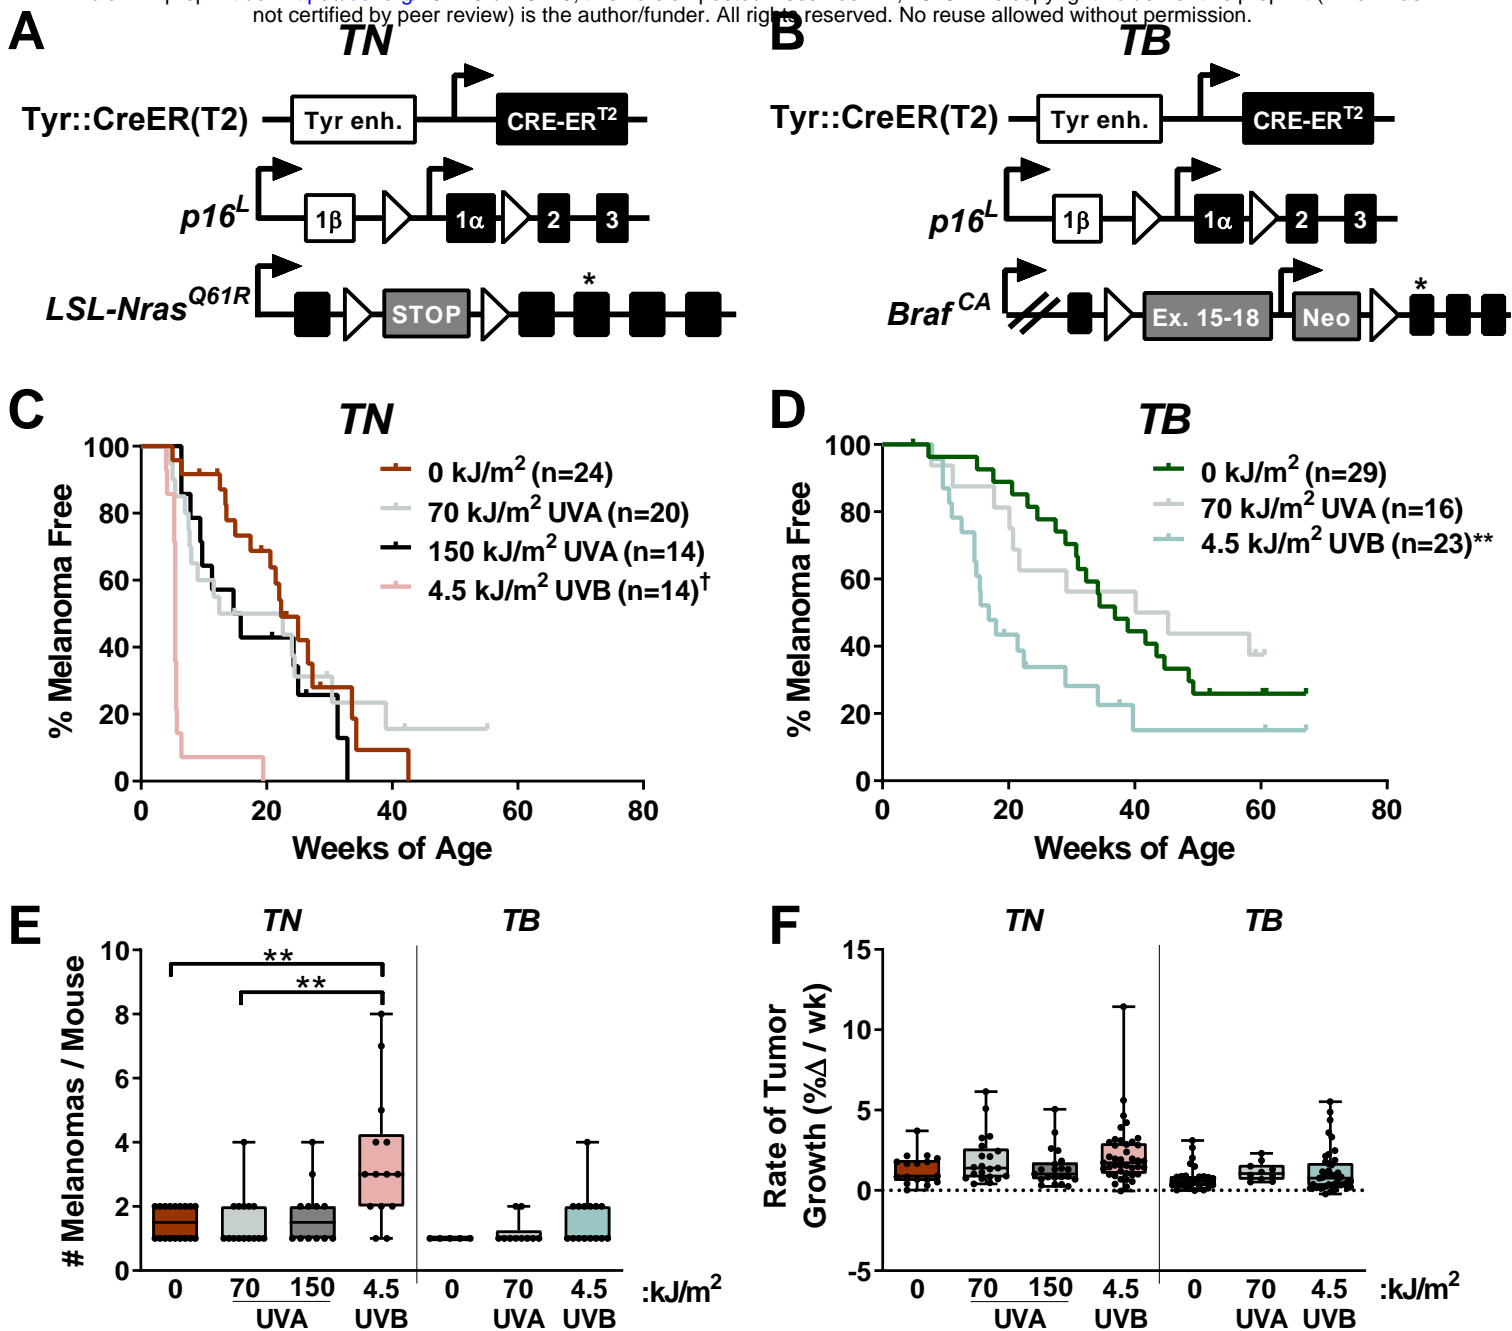

**Figure 1. Neonatal UV exposure alters melanoma onset in *TN* and *TB* mice.** **A**, *TN* mice are homozygous for a melanocyte-specific, tamoxifen-inducible Cre transgene (Tyr::CreER(T2)), a conditional *p16<sup>INK4a</sup>* knockout allele (*p16<sup>L</sup>*), and a conditional *Nras<sup>Q61R</sup>* knock-in allele (*LSL-Nras<sup>Q61R</sup>*). Open triangles represent LoxP sites. A star indicates the location of the *Nras<sup>Q61R</sup>* mutation. **B**, *TB* mice carry a single, *Braf<sup>V637E</sup>* conditional allele (*LSL-Braf<sup>CA</sup>*) and are homozygous for Tyr::CreER(T2) and *p16<sup>L</sup>*. Note that BRAF<sup>V637E</sup> is the murine equivalent of human BRAF<sup>V600E</sup>. Open triangles represent LoxP sites and the location of the V637E mutation is indicated by a star. **C & D**, Kaplan-Meier curves depicting the melanoma-free survival of *TN* (C) and *TB* (D) mice treated on postnatal day three with a single dose of ambient light (0 kJ/m<sup>2</sup>), UVA or UVB. † =  $p < 0.0001$ , \*\* =  $p < 0.01$  comparing control (0 kJ/m<sup>2</sup>) and UV-irradiated animals of the same genotype (Gehan-Breslow-Wilcoxon). **E**, Total tumor burden of control and UV-irradiated *TN* and *TB* mice at euthanasia. Each circle represents a single mouse. Boxes represent the mean and interquartile range for each group. Whiskers span from the minimum to the maximum value. \*\* =  $p < 0.01$  comparing control (0 kJ/m<sup>2</sup>) animals of the same genotype (two-tailed, unpaired t-tests with Welch's correction). **F**, Average tumor growth rates for UV- and mock-irradiated *TN* and *TB* mice. Each circle represents a single tumor (*TN*: 0 kJ/m<sup>2</sup> n=17; 70 kJ/m<sup>2</sup> UVA n=21; 150 kJ/m<sup>2</sup> UVA n=21; 4.5 kJ/m<sup>2</sup> UVB n=41; *TB*: 0 kJ/m<sup>2</sup> n=27; 70 kJ/m<sup>2</sup> UVA n=10; 4.5 kJ/m<sup>2</sup>, n=41). Data are presented as described in 'E'.

75 The onset of spontaneous melanoma was compared among mice exposed to No UV, UVA or  
76 UVB irradiation. Exposure to a single dose of 4.5 kJ/m<sup>2</sup> UVB dramatically accelerated melanoma  
77 onset and decreased overall survival in both the *TN* and *TB* models (**Figures 1C-D, Suppl. Figure**  
78 **S1**). Exposure to 70 kJ/m<sup>2</sup> UVA also enhanced melanoma formation, but only half of the mice  
79 developed tumors earlier than the median onset in unirradiated animals (**Figure 1C-D**). Doubling  
80 this dose of UVA in the *TN* model did not further facilitate melanoma formation, suggesting that  
81 70 kJ/m<sup>2</sup> UVA was sufficient to elicit the maximal response achievable with a single exposure  
82 (**Figure 1C**). Together, these results reveal the potent ability of narrow band UVB to promote  
83 melanoma formation in *TN* and *TB* mice. Furthermore, our findings suggest that UVA could  
84 facilitate melanoma onset in some settings, albeit to a much lesser extent than UVB.

85 We next examined the incidence and growth phenotypes of tumors arising in each of our  
86 experimental cohorts. Tumor incidence (# melanomas/mouse) increased in UVB-exposed *TN*  
87 mice, but was not significantly altered in *TN* animals treated with UVA or *TB* mice exposed to any  
88 form of UV (**Figure 1E**). Tumor distribution and incidence were also similar between male and  
89 female *TN* and *TB* mice regardless of exposure, with ~59% of tumors arising on the trunk, ~13%  
90 on the head and ~16% on the ears or tail (**data not shown**). Once established, *TN* and *TB* tumors  
91 grew at the same rate regardless of prior exposure (**Figure 1F**). Therefore, early tumor onset,  
92 rather than more rapid melanoma growth, is responsible for the reduction in overall survival  
93 observed in UVB-exposed *TN* and *TB* mice.

94 We postulated that melanomas arising in UVA- or UVB-exposed mice would exhibit distinct  
95 histopathological features. Therefore, we examined hematoxylin and eosin stained tumor sections  
96 representative of the rate of onset and body site distribution of melanomas from each cohort.  
97 Tumors from both models contained variable percentages of myxoid and spindle cells with  
98 comparable degrees of invasion, mitosis and granulocyte infiltration regardless of treatment  
99 (**Suppl. Figure S2A-C, data not shown**). A paucity of pilosebaceous units and hyperplasia of  
100 the overlying epidermis was also observed in UVA, UVB and unexposed mice of both genotypes

101 **(Suppl. Figure S2A&F)**. Most tumors from the UVB-treated *TN* cohort contained neoplastic cells  
102 with plasmacytoid features that were not prevalent in *TN* melanomas from the UVA and No UV  
103 cohorts (6 of 7 vs. 2 of 6 and 0 of 5 tumors, respectively; **Suppl. Figure S2D**). Fibroblastic features  
104 were seen in *TN* melanomas from UVA-treated animals (3 of 6), but were not overtly apparent in  
105 tumors from other *TN* mice (**Suppl. Figure S2E**). Unlike the *TN* model, tumor samples from *TB*  
106 mice contained areas of pigmentation, typically characterized by multiple clusters of  
107 melanophages distributed at the dermal-hypodermal interface with or without associated  
108 neoplastic cells and occasionally within the tumors (**Suppl. Figure S2F**). These results show that  
109 although the histopathological features of cutaneous murine and human melanomas differ, a  
110 single UVA or UVB exposure can promote the formation of cutaneous, murine tumors with distinct  
111 morphologic features.

112

### 113 **Identification of clustered *Flna* and *Map3k1* mutations in *TN* and *TB* melanomas**

114 Prior GEMM studies revealed an enrichment of *Trp53* mutations in melanomas accelerated  
115 by full-spectrum- (UVA + UVB) or UVB-irradiation (Viros et al. 2014; Mukhopadhyay et al. 2016;  
116 Trucco et al. 2019). However, *Trp53* mutations occur late in human melanoma pathogenesis  
117 (Shain et al. 2018). We sought to identify variants associated with earlier stages of melanoma  
118 progression, and performed WES using an ensemble calling approach to identify variants in *TN*  
119 and *TB* melanomas (see **Methods**). Pooled normals from each inbred mouse model served as  
120 germline controls and polymorphisms observed in dbSNP were excluded (Kitts et al. 2013).

121 Unlike previous reports, *Trp53* mutations were extremely rare in melanomas from our models  
122 (1 of 36 tumors, **Suppl. Table 1**). Instead, clustered, recurrent *Flna* and *Map3k1* alterations were  
123 observed in tumors from multiple *TN* and *TB* litters (**Figure 2A-C**). Thirteen of the 15 identified  
124 *Flna* mutations (87%) localized to the tenth Ig-like repeat of Filamin A (**Figure 2B**). Alterations in  
125 this domain are reported to alter Filamin A binding to F-ACTIN and may also affect protein  
126 translation and stability (Nakamura et al. 2007; Page et al. 2011; Suphamongmee et al. 2012).



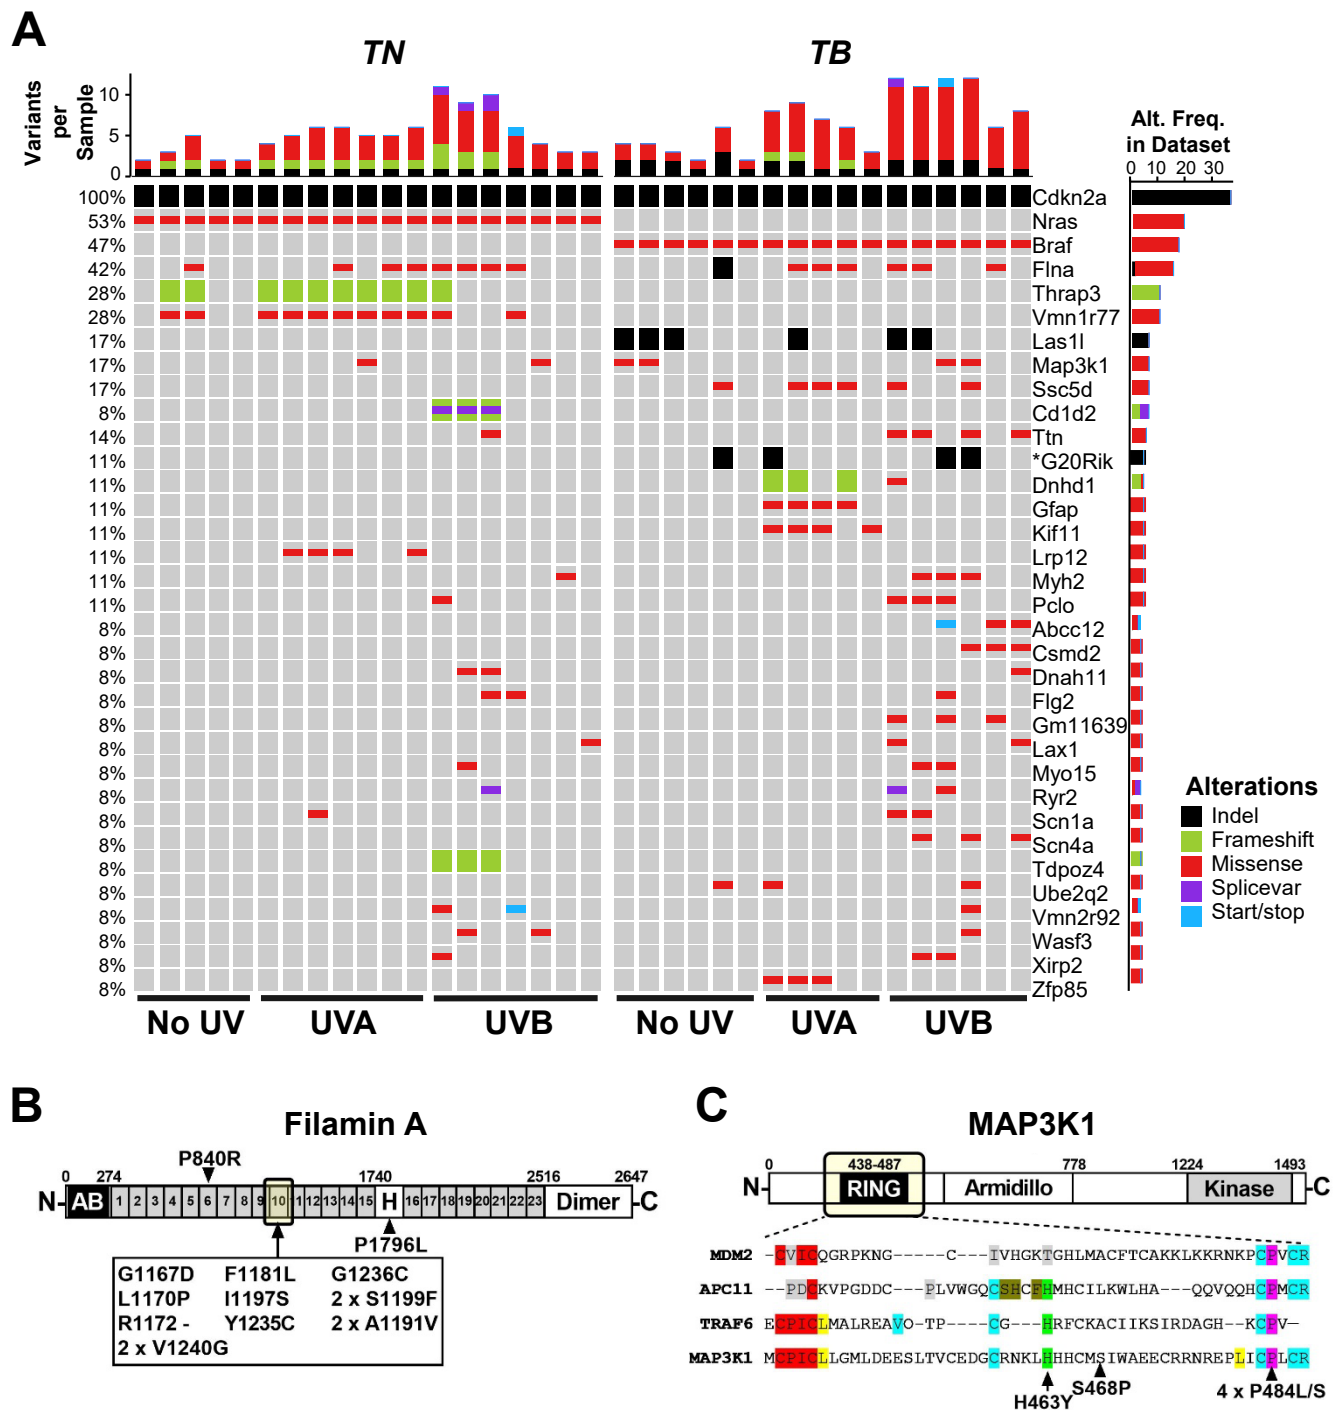

**Figure 2. Recurrent genetic alterations in murine models of UV-associated melanomagenesis.** **A**, Oncoprint depicting genes mutated in  $\geq 3$  *TN* and *TB* tumors treated with no UV, UVA or UVB. Color is used to indicate each mutation type: SNV, indel, frameshift, splice variant or nonsense/stop. Total mutation burden is shown at the top of each sample column. The frequency at which each gene is altered in the dataset is indicated to the right of each row. **B**, Schematic depicting the protein domains of Filamin A. A recurrent cluster of mutations was identified in the tenth Ig-like repeat domain as indicated by the arrow. **C**, Schematic depicting the protein domains of MAP3K1, where recurrent mutations were identified in the RING domain (arrows). Bottom panel depicts a multiple sequence alignment of related E3 ubiquitin ligases, highlighting the conservation of mutated residues.

127 Two *TN*, and four *TB* melanomas, contained mutations affecting conserved residues of the  
128 MAP3K1 RING domain (**Figure 2C**). These findings are consistent with prior publications  
129 implicating MAP3K1 and Filamin A in melanoma progression (Ni et al. 2013; Savoy and Ghosh  
130 2013; Mann et al. 2015; Trucco et al. 2020).

131

### 132 **UVB increases the SNV burden of *TN* and *TB* melanomas**

133 In contrast to human melanomas, tumors from genetically engineered mouse models are  
134 frequently characterized by a high burden of genomic copy number alterations (CNAs) and few  
135 single nucleotide variants (SNVs) (Hodis et al. 2012; Krauthammer et al. 2012; Zhang et al. 2016;  
136 Wang et al. 2017; Zloza et al. 2017). Thus, we sought to determine whether a single UVA or UVB  
137 exposure caused significant alterations to the genomic landscape of *TN* or *TB* tumors. Fewer  
138 CNAs were seen in all *TN* tumors exposed to UVB and in 5 of 7 *TN* tumors exposed to UVA as  
139 compared to melanomas from unirradiated controls (**Figure 3A-B**). Conversely, only 3 of 6  
140 melanomas from our UVB-irradiated *TB* mice had a lower CNA burden than tumors from  
141 unirradiated controls (**Figure 3A-B**). The most common CNA observed in *TB* tumors was a gain  
142 in chromosome 6, the chromosome in which *Braf* resides (**Figure 3A**). Consistent with this  
143 observation, 5 of 12 *TB* melanomas showed increased BRAF protein expression as compared to  
144 normal, murine skin (**Figure S3**). Recurring copy number gains in chromosomes 1 and 10 were  
145 also observed in tumors from the *TB*-UVA, *TN*-No UV and *TN*-UVA groups (**Figure 3A**).

146 The average burden of SNVs increased in both *TN* and *TB* melanomas as a result of prior  
147 UVB exposure, whereas the SNV burden of UVA-irradiated *TN* and *TB* tumors was slightly higher,  
148 but not statistically different, than that observed in tumors from the No UV groups (**Figure 3C**;  
149 0.67 vs. 0.93 and 1.44 vs. 0.65 SNVs/Mb on average, respectively). The frequency of insertions  
150 and deletions (indels) did not differ in tumors from irradiated and unirradiated *TB* mice, but  
151 increased in *TN*-UVB melanomas as compared to unirradiated controls (**Figure 3D**). Melanomas  
152 from UVB-irradiated *TN* and *TB* mice were also enriched for dipyrimidine substitutions, consistent

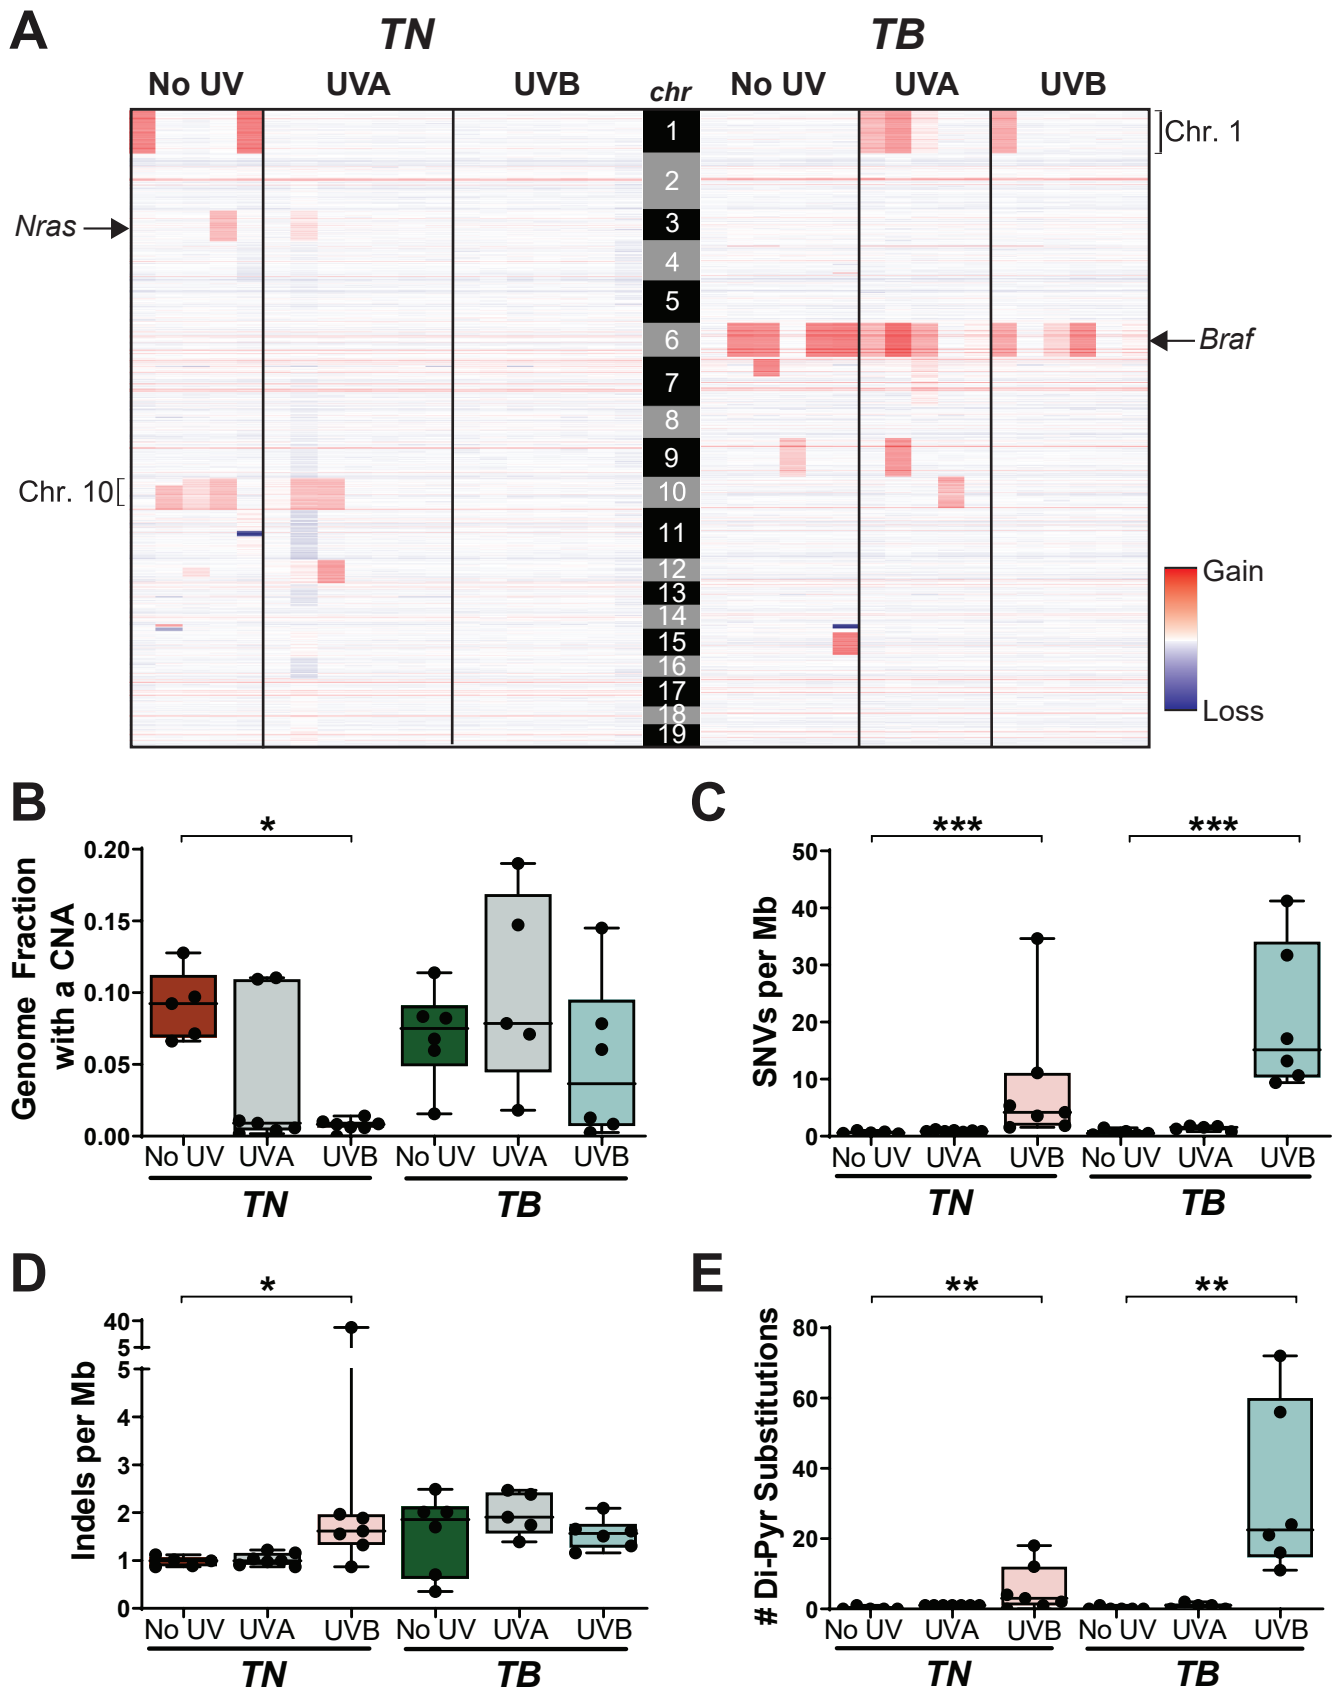

**Figure 3. UV alters the genomic landscape of TN and TB tumors.** **A**, Heatmap showing areas of genomic gain or loss within each sequenced tumor. Columns correspond to individual tumors and rows correspond to genomic bins. **B**, Fraction of each sequenced melanoma genome exhibiting a copy number alteration (CNA), graphed as a box plot with whiskers indicating the 5<sup>th</sup> and 95<sup>th</sup> percentiles. Dots represent individual tumors. p-values determined using a Kruskal-Wallis test with Dunn's correction. **C-D**, Single nucleotide variants (SNVs) (C) and indels (D) per megabase (Mb) of captured genome, plotted and analyzed as in 'B'. **E**, Number of dipyrimidine substitutions per tumor, plotted and analyzed as in 'B'. For **B-E**: \* =  $p < 0.05$ , \*\* =  $p < 0.01$ , \*\*\* =  $p < 0.001$ .

153 with the ability of UVB to promote cyclobutane pyrimidine dimer (CPD) formation (**Figure 3E**;  
154 (Cadet and Wagner 2013)).

155

### 156 **UVB drives genotype-dependent mutagenesis on the non-transcribed DNA strand**

157 UVA is the most prevalent form of UV in terrestrial sunlight; however, it is poorly absorbed by  
158 DNA (Setlow 1974; Sutherland and Griffin 1981; Pfeifer et al. 2005; Khan et al. 2018). By contrast,  
159 UVB can directly damage DNA and is the major form of UV responsible for skin erythema and  
160 many skin cancers (Setlow 1974). Both bands of the UV spectrum generate reactive species that  
161 promote the formation of a wide variety of modified nucleotides (Cadet and Wagner 2013). To  
162 examine whether distinct mutation types arise after UVA or UVB irradiation, we quantified the  
163 burden of each SNV type (C>A, C>G, C>T, T>A, T>C or T>G) in our sequenced *TN* and *TB*  
164 melanomas (**Suppl. Table 2A**). We also examined the prevalence of C>T transitions at CpG sites  
165 because methylated cytosines are reported to form cyclobutane pyrimidine dimers (CPDs) with  
166 higher efficiency than non-methylated cytosines (Tommasi et al. 1997).

167 We compared both the absolute number and relative frequency of each mutation type  
168 between tumor types from each genotype and UV irradiation status (**Suppl. Table 2B-C**). As  
169 anticipated, melanomas from UVB-treated *TB* mice had a greater number of C>T transitions than  
170 UVA or unirradiated controls of the same genotype (**Figure 4A&C, Suppl. Table 2B**;  $p < 1.02E-$   
171  $14$  and  $1.82E-13$ , respectively). The absolute number of C>T mutations was slightly, but not  
172 significantly, greater in *TN*-UVB than *TN*-NoUV tumors (**Figure 4A&C, Suppl. Table 2B**;  $p = 0.22$ ).  
173 However, the relative frequency of C>T mutations in both UVB-irradiated models was greater than  
174 UVA or unirradiated tumors of the same genotype (**Figure 4B, Suppl. Table 2C**;  $p < 3.90E-3$  for  
175 all comparisons). All groups showed a similar number and percentage of C>T alterations at CpG  
176 sites, suggesting that methylated cytosines are not preferentially mutated as a result of UVB  
177 irradiation (**Figure 4B-C**). Indeed, differences in C>T burden and frequency were primarily driven  
178 by mutations at non-CpG sites (**Suppl. Table 2B-C**). The increased frequency of C>T mutations

179 was accompanied by decreases in the frequency of T>C mutations in tumors from both UVB-  
180 irradiated models (**Figure 4B; Suppl. Table 2C**). No other mutation types were enriched in a  
181 specific genotype or UV irradiation group (**Suppl. Table 2B-C**).

182 We looked for evidence of oncogene-dependent mutational enrichments and found that C>T  
183 transitions were more abundant ( $p < 9.79E-13$ ) in *TB*-UVB tumors than *TN*-UVB tumors (**Figure**  
184 **4C, Suppl. Table 2B**). Other mutation types did not differ significantly in number or frequency  
185 between the two genotypes (**Suppl. Table 2B-C**). These data highlight differences in the ability  
186 of UVA and UVB to drive melanoma-associated mutations and suggest that an underlying *Braf*  
187 mutation may promote the accumulation of C>T transitions.

188 Studies in cultured fibroblasts and model organisms implicate transcription-coupled repair  
189 (TCR) in the rapid repair of UV-induced DNA lesions (Marteijn et al. 2014). Therefore, we  
190 investigated whether the SNVs observed in our *TN* and *TB* tumors exhibited a strand bias.  
191 Mutations in mock- and UVA-irradiated tumors did not exhibit a strand bias, except in the case of  
192 T>C transitions, which were enriched on the non-transcribed strand of *TB*-UVA samples (**Figure**  
193 **4D, Suppl. Table 2D**). Tumors from both UVB-treated models showed a bias for C>T mutations  
194 on the non-transcribed strand. C>A, T>A, T>C and T>G mutations were also enriched on the non-  
195 transcribed strand of *TB*-UVB, but not *TN*-UVB, tumors. This finding suggests a disparity among  
196 *TN* and *TB* melanomas in the biochemistry, incidence or repair of UV-associated DNA lesions.

197

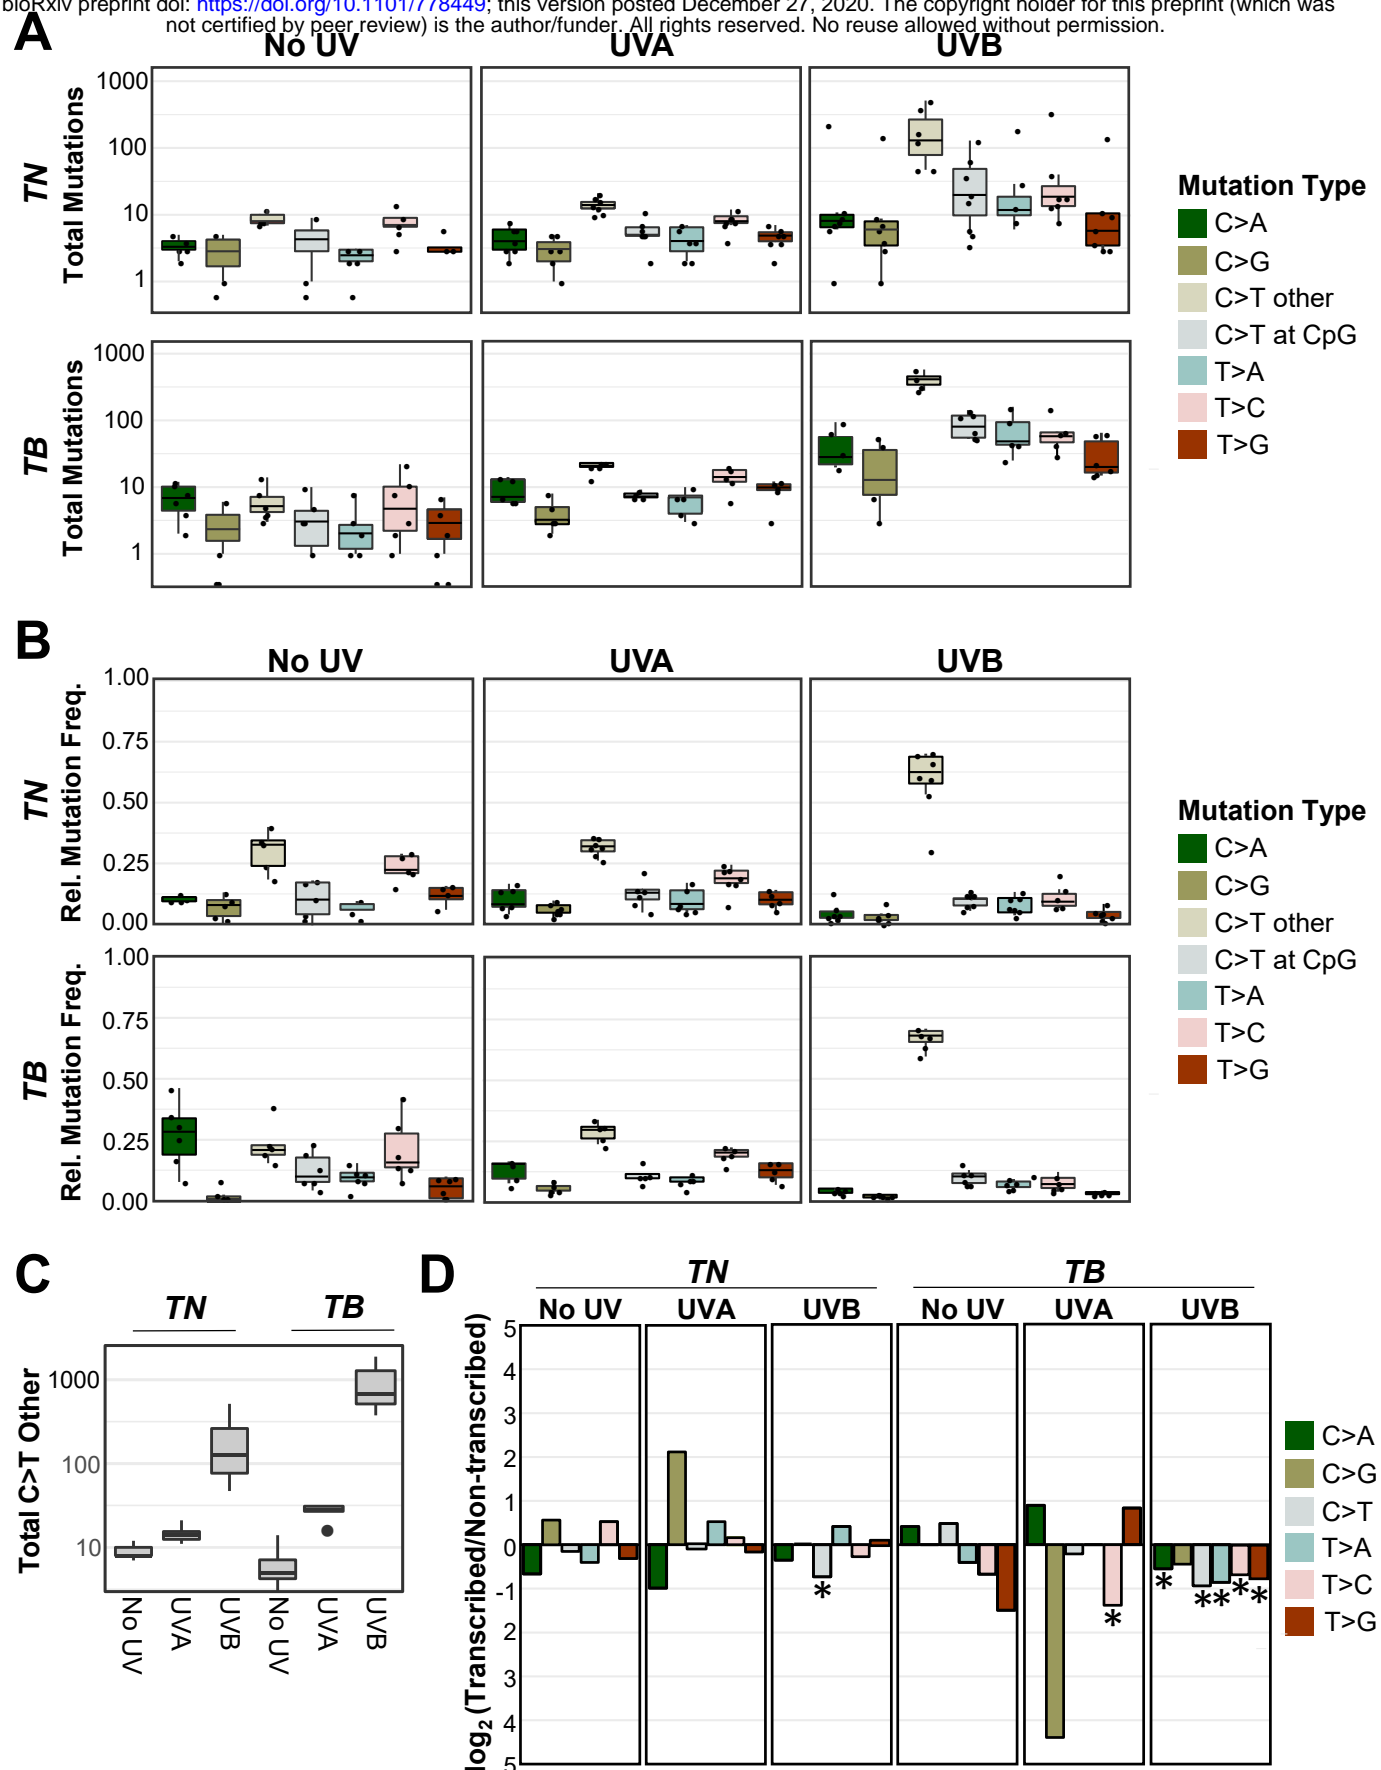

**Figure 4. C>T mutations predominate in UVB-induced melanomas. A-B,** Absolute mutation burden (A) and frequency (B) of each mutation type in *TN* and *TB* tumors arising after mock (No UV), UVA or UVB exposure. See **Suppl. Table 2B-C** for a complete listing of p-values for all comparisons. Statistical significance was evaluated using an ANOVA with Tukey's HSD post-hoc test. **C,** Boxplot as depicted in (A), restricted to only C>T SNVs at non-CpG locations. **D,** The strand location of each mutation type was determined using aggregate data from the indicated mouse models and exposures. Plotted are the log-transformed ratios of transcribed versus non-transcribed mutations. Statistical significance of strand bias was assessed using a Poisson test, where an \* indicates significant enrichment. Complete p-value listings are found in **Suppl. Table 2D**.

## 198 Identification of a UVB mutational signature enriched in *TB*-UVB melanomas

199 CPD-associated C>T lesions are considered classical 'UVB signature mutations' and occur  
200 preferentially at dipyrimidine sites (Alexandrov et al. 2013a). C>T transitions in other, non-  
201 cutaneous cancers lack this specificity (Mitchell et al. 1992). For this reason, we took our  
202 sequenced *TN* and *TB* melanomas and quantified the burden of each SNV type within every  
203 possible trinucleotide context (**Suppl. Table 3A**). Consistent with these observations, C>T  
204 transitions were enriched at TCT and CCT sites in UVB-accelerated *TN* and *TB* melanomas  
205 (**Figure 5A & B**, grey bars). UVB also increased the percentage of C>T mutations at other  
206 dipyrimidine sites (CCA, CCC, TCA, TCC and TCG) as compared to No UV control tumors in the  
207 *TB* model. In contrast to UVB-accelerated melanomas, tumors from mock and UVA-irradiated *TB*  
208 and *TN* mice showed a similar distribution of mutations amongst the sixteen potential trinucleotide  
209 sites (**Figure 5A & B**). These data are consistent with the pattern of C>T mutations previously  
210 observed in a *Braf*-mutant melanoma mouse model chronically irradiated with UVB (Trucco et al.  
211 2019) and prompted us to further explore whether a mutational signature of UVB exposure might  
212 be elucidated from our data.

213 We used SigProfiler (Alexandrov et al. 2013b) to extract co-occurring mutational patterns,  
214 'mutational signatures', from our complete tumor dataset. This method consistently identified two  
215 distinct mutational processes operational in our *TN* and *TB* melanomas: Signature 1 and  
216 Signature 2 (**Figure 6A; Suppl. Table 3B**). The profile of Signature 1 contained an abundance of  
217 C>T mutations, with a preference for alterations with a 5' thymidine (TCT>TCC>TCA>TCG,  
218 mutated base is underlined). In contrast, the profile of Signature 2 was relatively flat with no  
219 specific mutational preference. To ensure that Signatures 1 and 2 were both reproducible and  
220 robust, we used two additional algorithms to extract mutational signatures from our complete  
221 dataset: SignatureAnalyzer (Kasar et al. 2015) and MutationalPatterns (Blokzijl et al. 2018).  
222 Consistent with SigProfiler, SignatureAnalyzer and MutationalPatterns identified two distinct  
223 mutational processes in our dataset (**Suppl. Figure S4**, data not shown). A high degree of

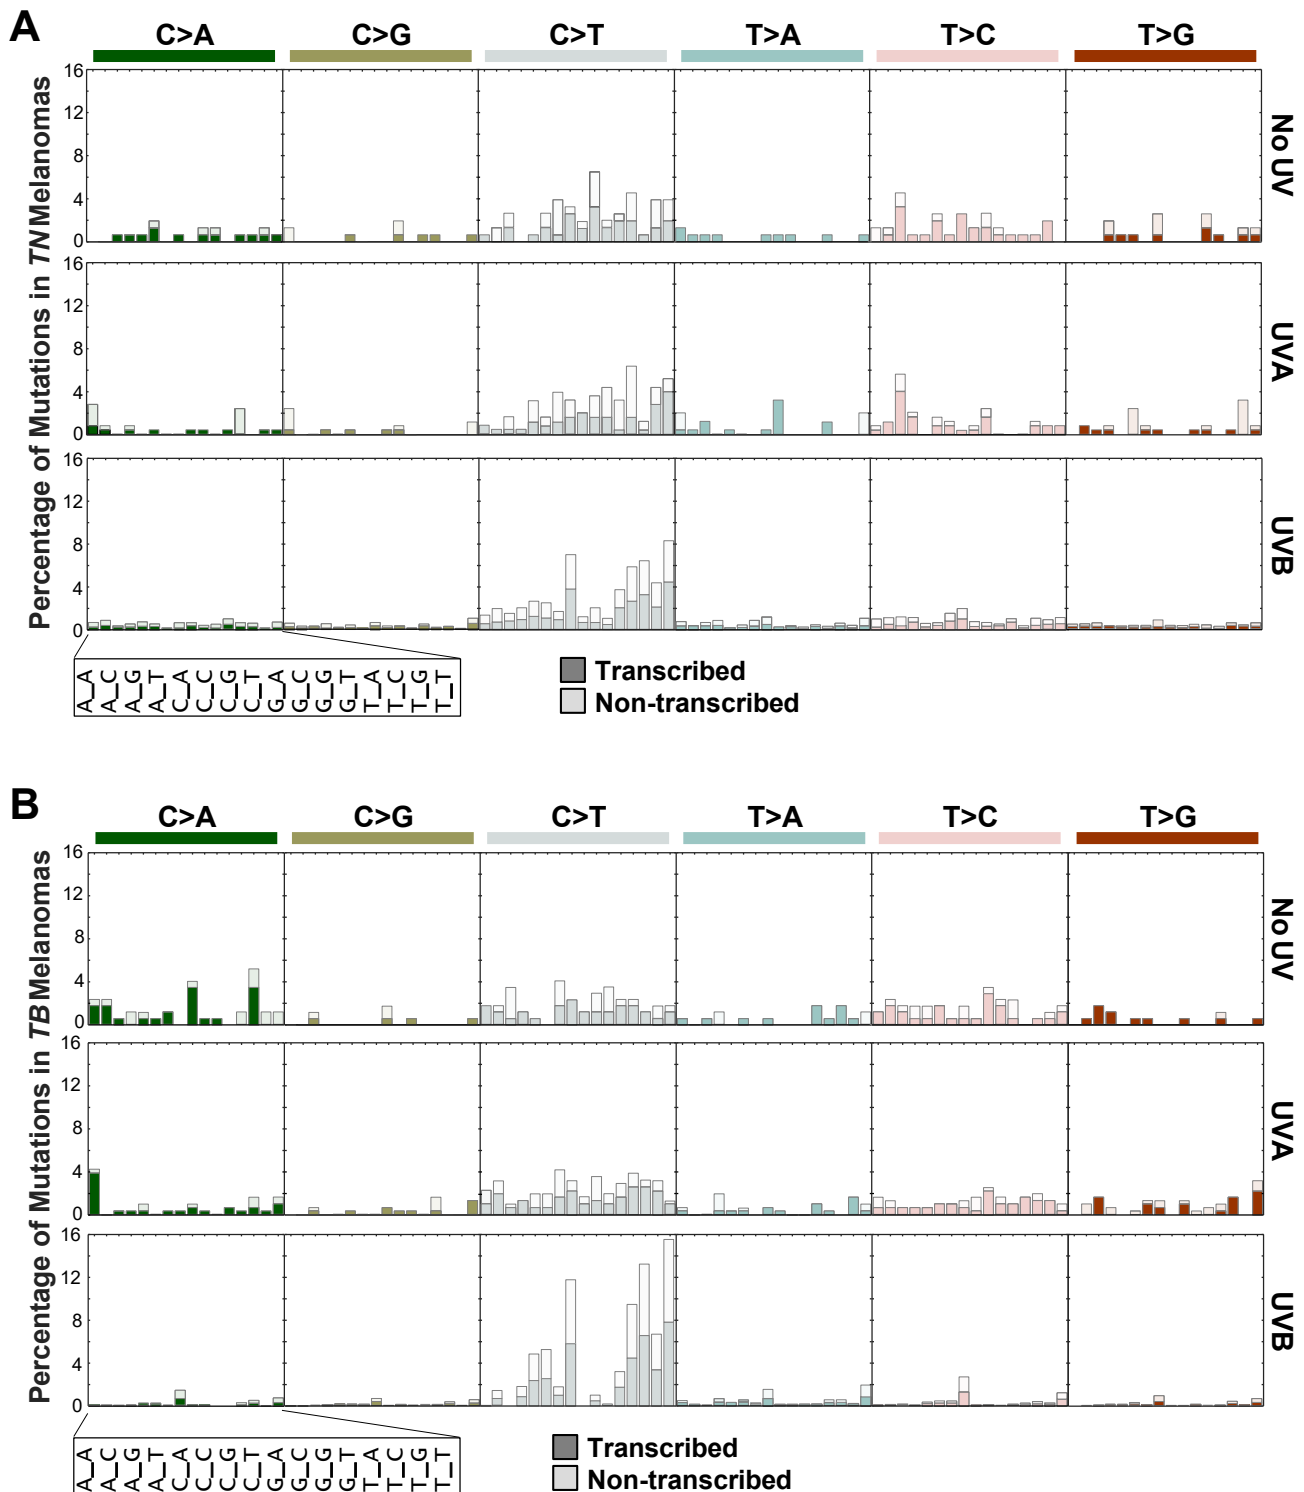

**Figure 5. UVB-induced C>T transitions occur within similar trinucleotide contexts in *TN* and *TB* melanomas. A-B**, Barplots indicating the percentage of each indicated mutation type for a given trinucleotide context in *TN* (A) and *TB* (B) tumors. Each subgraph is a mutation type as indicated, where each column within the graph represents a different trinucleotide context surrounding the SNV of interest. Dark shaded bars represent alterations that occur on the transcribed strand while non-shaded bars indicate alterations that occur on the non-transcribed strand. The height of each bar corresponds to the average number of mutations in the indicated experimental group, normalized to the frequency of the relevant trinucleotide sequence in the mouse exome.



224 similarity was seen between signatures identified by each algorithm, suggesting that the  
225 mutational signatures initially found using SigProfiler were robust (**Figure 6B**).

226 We next looked to see if either of the SigProfiler (SP) signatures were enriched in a genotype-  
227 or treatment-dependent manner in our mouse melanomas. Signature 2 showed a slight  
228 enrichment for pyrimidine transitions, but this enrichment was not specific to any genotype or  
229 UV treatment, consistent with the idea that Signature 2 represents background noise or mutagenic  
230 process common to all experimental groups (**Figure 6C**). Signature 1 was enriched in melanomas  
231 from UVB-irradiated *TN* and *TB* mice over those from No UV- or UVA-treated animals (**Figure**  
232 **6C, Suppl. Table 3C-D**). This enrichment was more pronounced in UVB-*TB* than UVB-*TN* tumors,  
233 indicating a greater effect of UVB on the mutational profile of *TB* tumors.

234 The enrichment of Signature 1 in UVB-treated mice suggested that this profile could exhibit  
235 features in common with mutational signatures enriched in sun-exposed human tumors.  
236 Therefore, we looked at the cosine of similarity between the signatures identified in our murine  
237 dataset and the COSMIC mutational signatures. Our Signature 2 was associated with clock-like  
238 signatures that correlate with patient chronologic age, including: SBS40 and SBS5 (**Figure 6D,**  
239 **Suppl. Table 3E**; (Alexandrov et al. 2013a; Alexandrov et al. 2015) . Our Signature 1 closely  
240 correlated with SBS7a and 7b (cosine of similarity 0.81 and 0.77, respectively), which are  
241 associated with cancers in sun exposed skin and linked to UV damage (Alexandrov et al. 2013a).  
242 Interestingly, there was no significant association between Signature 1 and two other COSMIC  
243 signatures, SBS7c and SBS7d, which are enriched in skin cancer and characterized by T>A and  
244 T>C SNVs (cosine of similarity 0.24 and 0.18 respectively) (Alexandrov et al. 2020). These data  
245 suggest that mutagenic processes not modeled by our GEMMs may also contribute to human  
246 melanomagenesis; however, SBS7a and SBS7b are the predominant signatures found in human  
247 melanoma.

248

249

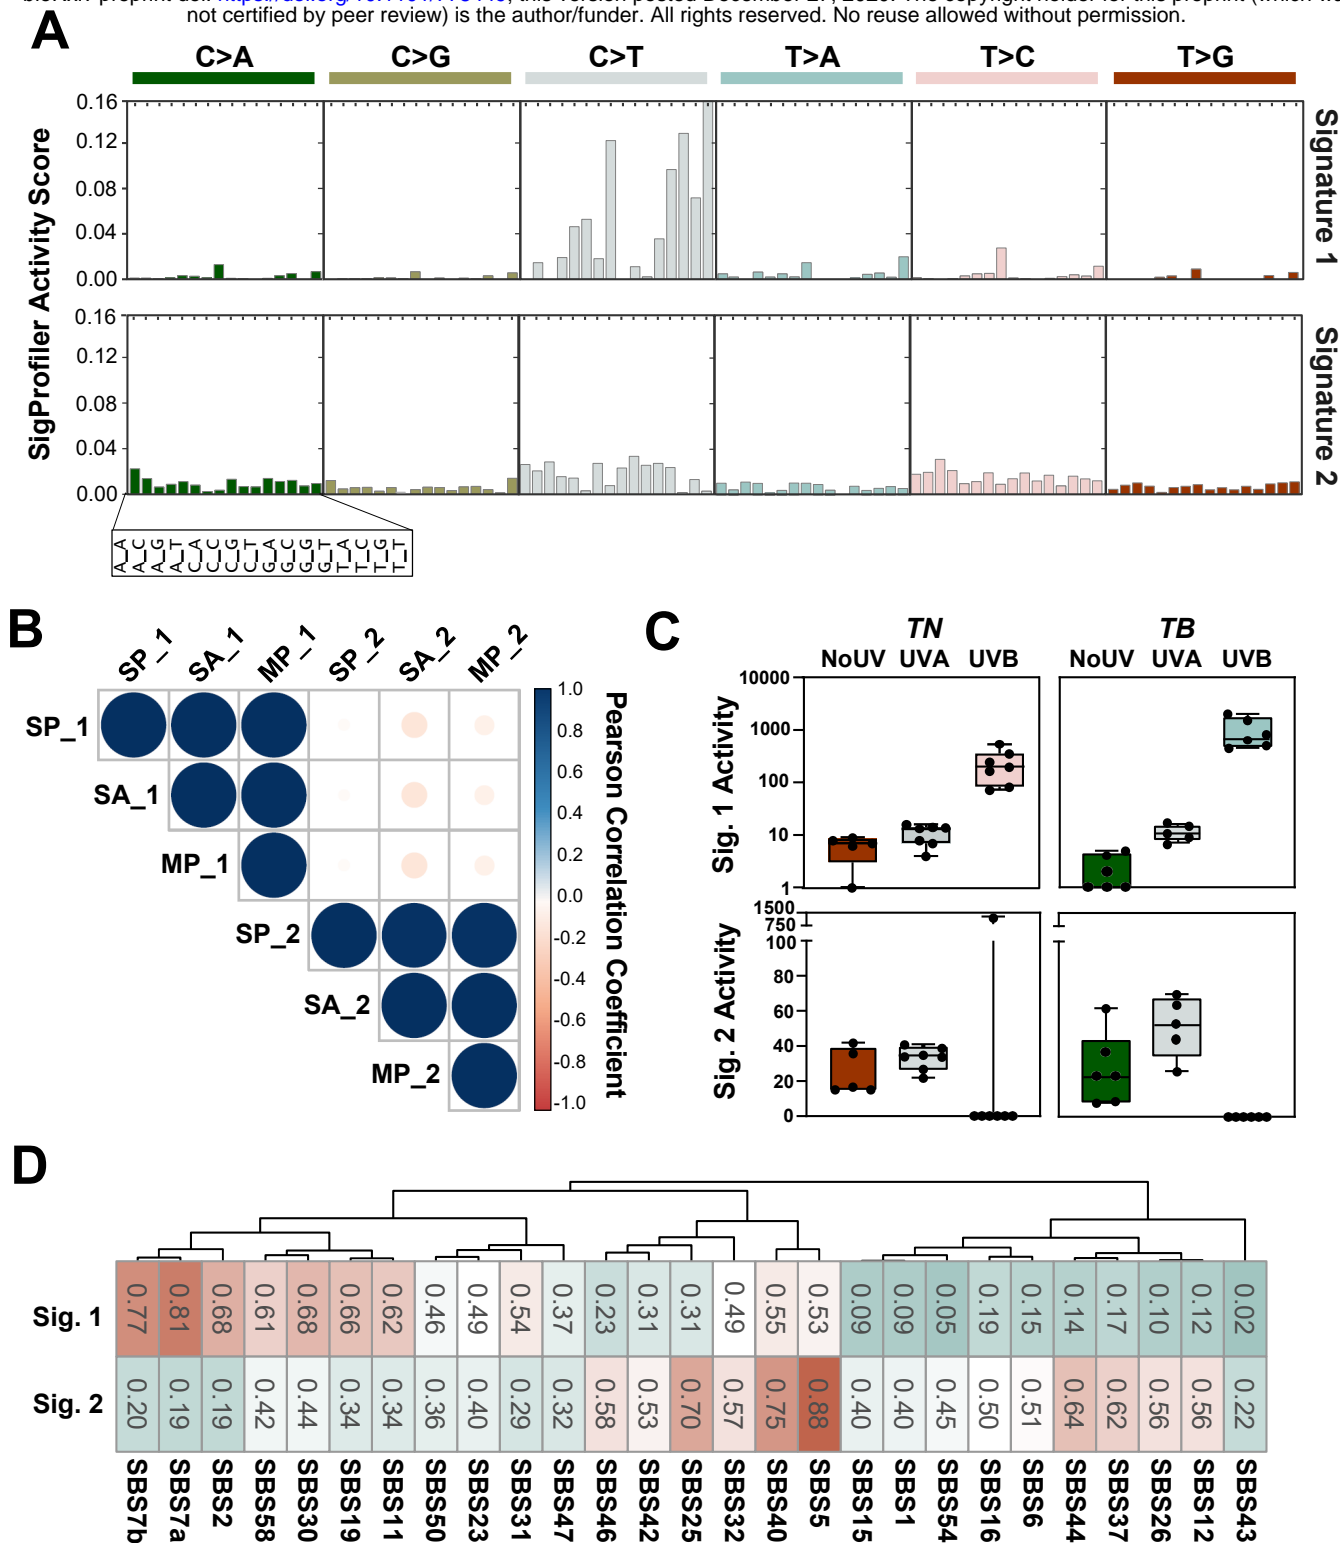

**Figure 6. UVB-enriched murine mutational signatures resemble those found in human melanomas.** **A**, SigProfiler was used to identify *de novo* mutational signatures in sequenced *TN* and *TB* melanomas. Two signatures were selected based on the average frobenius reconstruction error and signature stability. The y-axis indicates the relative contribution of each trinucleotide mutation type to the discovered mutational signature. Values can be found in **Suppl. Table 3B**. **B**, Relationships between signatures derived from SigProfiler (SP\_1, SP\_2), MutationalPatterns (MP\_1, MP\_2) and SignatureAnalyzer (SA\_1, SA\_2) are shown. Color indicates the directionality of each correlation with blue indicating concordance and red indicating discordance. The size of each dot represents the absolute value of the correlation. **C**, Enrichment of SigProfiler signatures in *TN* and *TB* tumors of each exposure type. Significant differences between groups were assessed using an ANOVA with a Fisher's Least Significant Difference post-test. Complete *p*-value listings appear in **Suppl. Table 3D** and total mutation counts in **Suppl. Table 3C**. **D**, Relationship between SigProfiler mutational signatures identified in our dataset (Sig. 1, Sig. 2) and single base substitution (SBS) patterns in the COSMIC database. **Suppl. Table 3E** contains a complete listing of all *p*-values, which were empirically generated through a cosine similarity permutation test as described in the methods.

## 250 DISCUSSION

251 Human melanoma has one of the highest mutational burdens of any tumor type (Alexandrov  
252 et al. 2013a). Yet, tumors arising in most melanoma GEMMs, including our unirradiated *TN* and  
253 *TB* mice, are largely characterized by CNAs rather than SNVs (Hodis et al. 2012; Krauthammer  
254 et al. 2012; Zhang et al. 2016; Wang et al. 2017; Zloza et al. 2017). Here we find that a single  
255 UVB exposure can resolve this conundrum and effectively recapitulate the high burden of SNVs  
256 in human melanoma. Furthermore, the pattern of SNVs in our models is representative of  
257 mutational signatures observed in the sun-exposed, human tumors (**Figures 3E, 6C-D**). The  
258 UVB-signature derived from our mice does have a higher number of TCT>TTT variants than  
259 SBS7a and SBS7b (**Figure 6A**; (Alexandrov et al. 2020)) However, this could be attributed to  
260 differences in the trinucleotide frequencies found in each species. Variances in the sequences of  
261 transcribed mouse and humans genes could also bias which CPD lesions are efficiently targeted  
262 by transcription-coupled repair. Of note, human squamous cell carcinomas deficient in global  
263 nucleotide excision repair, exhibit a bias for TCT>TTT variants similar to our models (Chang and  
264 Shain 2020). Therefore, differences in how human and mouse cells repair UV lesions may explain  
265 the increased prevalence of TCT>TTT variants in our UVB signature. The fact that TCT>TTT  
266 variants are enriched in other UVB-accelerated GEMMs further supports this hypothesis (Viros et  
267 al. 2014; Mukhopadhyay et al. 2016; Trucco et al. 2019).

268 Our UVB model recapitulates the burden and distribution of SNVs in human melanoma and  
269 identifies recurrently mutated genes seen in the human disease. Specifically, we identify clustered  
270 *Map3k1* and *Flna* mutations in *TN* and *TB* melanomas irrespective of UV-irradiation status  
271 (**Figure 2**). *Map3k1* is amplified in a subset of human desmoplastic melanomas (Shain et al.  
272 2015a) and was previously linked to melanoma progression by two, independent transposon-  
273 mediated mutagenesis screens conducted in the Tyr::CreER(T2) *Braf*<sup>CA</sup> model (Ni et al. 2013;  
274 Mann et al. 2015). Nevertheless, it remains to be determined how mutations affecting the  
275 MAP3K1 RING domain influence tumorigenesis. Similar to MAP3K1, functional defects in Filamin

276 A are implicated in the progression of solid tumors (Savoy and Ghosh 2013). In our models, *Flna*  
277 mutations localize primarily to the tenth Ig-like repeat. This domain is responsible for F-actin  
278 binding and associated with germline mutations that cause several otopalatodigital spectrum  
279 disorders (OSDs) (Moutton et al. 2016). Collectively, these results highlight the potential of  
280 forward genetics approaches, like that employed here, to offer insights into the distinct  
281 evolutionary trajectories initiated by oncogenic and environmental pressures.

282 Our results indicate a disparity in the melanomagenic potential of UVA and UVB. Along with  
283 prior publications (Noonan et al. 2012; Trucco et al. 2019), these data provide additional evidence  
284 that UVA exposures may increase melanoma risk, but not to the same extent as UVB. It is  
285 noteworthy that the higher burden of mutations in our UVB tumors did not provide a growth  
286 advantage (**Figures 1F, 3C**). Rather, UVB seems to enhance the ability of genetically  
287 predisposed melanocytes to initiate tumor formation. This finding aligns with Blum's interpretation  
288 of the kinetics by which UV initiates non-melanoma skin cancers in albino mice (Blum 1969).  
289 Specifically, Blum hypothesized that UV-dependent tumor initiation requires a combination of  
290 genetic and mitogenic effects. Therefore, in our genetically pre-disposed models, UV-induced  
291 growth factors may facilitate initial tumor growth leading to an earlier onset.

292 What distinguishes this study from past investigations is the direct comparison of UV-  
293 carcinogenesis in *NRAS*- and *BRAF*-mutant melanoma. While we did not evaluate the response  
294 of healthy tissue, this approach did allow us to detect differences in the mutagenicity of a single  
295 UVB exposure among melanomas expressing endogenous levels of mutant *NRAS* or *BRAF*  
296 (**Figure 2**). It is unlikely that the increased mutational burden of UVB-accelerated *TB* tumors is  
297 solely attributed to the longer latency of these tumors as compared to UVB-initiated *TN*  
298 melanomas (**Figure 1C-D**). Notably, despite differences in tumor latency, *TN* and *TB* melanomas  
299 from the UVA and No UV groups exhibit a similar number of SNVs per Mb (**Figure 3C**).  
300 Furthermore, differential enrichment of the UVB mutational signature, as well as dipyrimidine  
301 substitutions, suggest that UVB carcinogenesis differs between the two models (**Figures 3E, 6C**).

302 Whether this difference explains the increased prevalence of *BRAF*-mutant melanomas on parts  
303 of the body intermittently exposed to sunlight requires further investigation.

304 As mentioned in the introduction, a similar proportion of UV signature lesions (C>T and  
305 CC>TT) are seen in *NRAS*- and *BRAF*-mutant human melanomas, despite the predominance of  
306 *NRAS*-mutant tumors in chronically sun damaged skin (Cancer Genome Atlas 2015). If, as  
307 predicted by our data, the presence of a *BRAF* mutation enhances UVB carcinogenesis, then  
308 fewer exposures might be required for melanoma progression. Alternatively, *BRAF* and *NRAS*-  
309 mutant cells may exhibit differential thresholds for genotoxic stress-induced apoptosis or  
310 senescence.

311 Understanding how *NRAS*- and *BRAF*-mutant melanocytes respond to UVB damage will likely  
312 offer insight into the differential SNV burden observed here. Genotype-dependent DNA-damage  
313 responses were recently reported in melanoma cell lines (Sauvaigo et al. 2020). However, an  
314 earlier report saw no correlation between repair capacity and melanoma genotype (Gaddameedhi  
315 et al. 2010). In *BRAF*-mutant melanomas, loss of p19<sup>ARF</sup> promotes the epigenetic silencing of  
316 *XPC*, leading to deficiencies in nucleotide excision repair (Luo et al. 2013). Meanwhile,  
317 pharmacological inhibition of *BRAF* has been shown to increase nuclear import of the by-pass  
318 polymerase, Pol-K, resulting in increased drug tolerance without clear evidence of enhanced  
319 mutagenesis (Temprine et al. 2020). Collectively, these results suggest that melanocyte genotype  
320 is likely to modulate the cellular response to UV. However, these studies utilized cell lines or  
321 extracts, which fail to model the early stages of melanomagenesis and the potential influence of  
322 the tumor microenvironment on repair. We posit that isogenically controlled, *in vivo* studies will  
323 be necessary to understand how distinct oncogenic and mutagenic stresses cooperate to  
324 modulate DNA-damage response and cellular fitness.

325

## 326 **METHODS**

### 327 **Mouse models**

328 All animal research protocols were approved by The Ohio State University Institutional Animal  
329 Care and Use Committee (Protocol #2012A00000134). Mice were backcrossed >7 generations  
330 to pigmented, C57BL/6J animals. Inducible knock-in and knockout alleles were activated with 20  
331 mM 4-hydroxytamoxifen on postnatal (p.n.) days one and two as described (Burd et al. 2014).  
332 Subjects from each litter were randomly assigned to receive either ambient light (No UV), UVA or  
333 UVB on p.n. day three. A single dose of narrow band UVB was delivered to the dorsal side of  
334 each animal using a fixed position, 16W, 312nm light source (Spectronics #EB-280C). Based  
335 upon the spectrum and intensity of this light source, we calculated the McKinlay-Diffey erythema  
336 effective energy (EEE) of a 4.5 kJ/m<sup>2</sup> dose, delivered over ~77 seconds, to be 75 mJ/cm<sup>2</sup> ((Diffey  
337 2002); **Suppl. Figure S5A**). A dose of 75 mJ/cm<sup>2</sup> EEE UVB is equivalent to 3.9 human minimal  
338 erythema doses (MEDs) in an individual with phototype II skin (i.e. someone who tans minimally,  
339 but usually burns with red/blond hair and blue/green/hazel eyes) or to approximately 40 minutes  
340 of sun exposure when the UV index is Very High [see (Hennessey et al. 2017) for additional  
341 information]. UVA was similarly delivered using a 16W source containing two BLE-8T365 bulbs  
342 (Spectronics). Based upon the spectrum of these bulbs, the calculated McKinlay-Diffey erythema  
343 effective energy (EEE) of a 70 kJ/m<sup>2</sup> dose is 14.2 mJ/cm<sup>2</sup> ((Diffey 2002); **Suppl. Figure S5B**).  
344 The average tanning parlor dose is 4.5 Standard Erythema Doses (SEDs; (Dowdy et al. 2011).  
345 One SED is equivalent to 10 mJ/cm<sup>2</sup> EEE-weighted UV light (Diffey 2002). Therefore, an  
346 individual receives >3 times more UVA in an average tanning session than a mouse in our 70  
347 kJ/m<sup>2</sup> experimental protocol (45 mJ/cm<sup>2</sup> / 14.2 mJ/cm<sup>2</sup> = 3.17).

348

### 349 **Tumor monitoring, processing and histopathology**

350 Protocols for tumor monitoring, processing and immunoblotting appear in the **Supplemental**  
351 **Methods**. Tumor morphology was assessed by a certified member of the American College of

352 Veterinary Pathologists (KMDL) using methods described by Banerjee and Harris (Banerjee and  
353 Harris 2000). In each sample the extent of skin and subcutis tumor invasion, tumor pigmentation  
354 and the maximum number of mitotic figures were determined from three different fields of view  
355 using a 40x objective and 10x ocular lens with a field number of 22 mm.

356

### 357 **Whole exome sequencing**

358 Tumor and germline control DNA was isolated and quality controlled as described in the  
359 **Supplemental Methods**. Indexed libraries were generated from 200 ng of genomic DNA using  
360 the Kapa Hyper Prep and Agilent SureSelectXT Mouse All Exon target enrichment systems.  
361 Exome hybridization was conducted using 500 ng of each DNA library and the resulting target-  
362 enriched fragments PCR-amplified (11 cycles). Indexed libraries were pooled and subjected to  
363 paired-end 150 bp sequencing on an Illumina HiSeq4000. Average target coverage was 75X  
364 (range 53 - 107X). An overview of WES mapping and coverage metrics appears in **Supplemental**  
365 **Table 4**.

366

### 367 **Variant Calling**

368 Sequences were aligned to mm10 using BWA (version 0.7.15) (Li and Durbin 2009).  
369 Duplicates were removed using Picard version 2.17.11 and the resulting sequences re-aligned  
370 around indels using GATK version 3.6 (McKenna et al. 2010). Variants were called using  
371 VarScan2 (version 2.4) (Koboldt et al. 2012), Mutect2 (Cibulskis et al. 2013) and Strelka2 (Kim et  
372 al. 2018). Variants identified by all three callers were filtered to remove existing variations in the  
373 Ensembl mouse variation database (Yates et al. 2020) and annotated using Variant Effect  
374 Predictor (McLaren et al. 2016). Over 200 calls across samples were visually inspected for depth,  
375 alignment and read quality in Integrated Genomics Viewer (IGV; (Robinson et al. 2011)).  
376 Dipyrimidine mutations were counted as a single event when calculating total mutational burden.

377

378

### 379 **Analysis of SNVs and CNAs**

380 SNV burden (variants/Mb) was calculated as a function of the total capture region. SNVs  
381 occurring within a dipyrimidine sites were counted as a single event. Oncoprints of genes mutated  
382 in three of more mouse melanomas were made with ComplexHeatmap version 2.0.0 (Gu et al.  
383 2016). To calculate the overlap with human tumors, CNAs were identified using CNVkit (Talevich  
384 et al. 2016). Reported CNAs passed a  $\log_2$  segmentation threshold of 0.2 with support from at  
385 least five bins. Genome fraction containing a CNA was determined by computing the footprint of  
386 segments surpassing the copy number threshold and dividing this by the total footprint of all  
387 segments.

388

### 389 **Mutational spectrum analysis**

390 The total burden and relative contribution of each mutation type to No UV-, UVA- and UVB-  
391 induced melanomas was determined using the “mut\_type\_occurrences” algorithm in the R  
392 package for *MutationalPatterns* (Blokzijl et al. 2018). Differences in the absolute number of  
393 mutations were assessed using a Mann-Whitney U test. Differences in frequency of each SNV  
394 type between UVA or UVB samples versus controls (No UV) were determined using t-tests with  
395 Holm’s adjustment for multiple comparisons ( $p < 0.05$  considered significant).

396 A MATLAB implementation of SigProfiler (Alexandrov 2020) and an R implementation of  
397 SignatureAnalyzer (Kim et al. 2016) were used to identify *de novo* mutational signatures. Average  
398 Frobenius reconstruction error and signature stability were used to select the number of  
399 signatures in SigProfiler. The number of signatures selected by SignatureAnalyzer was  
400 determined using a Bayesian NMF model described previously (Kim et al. 2016), where two  
401 signatures were the most frequent selection from 20 iterations. *MutationalPatterns* was used to  
402 examine strand bias and identify *de novo* mutational signatures (Blokzijl et al. 2018). The number  
403 of signatures was selected using non-negative matrix factorization, and a rank of 2 was chosen



404 based on maximization of variance explained and cophenetic score. Comparison of *de novo*  
405 mutational signatures from SigProfiler and those appearing in COSMIC version 3 (Alexandrov et  
406 al. 2020) was completed using a cosine of similarity test, for which empirical *p*-values were  
407 generated based on 1,000,000 permutations using the “cosinePerm” function from the  
408 PharmacGx package (Smirnov et al. 2016).

409

#### 410 **DATA ACCESS**

411 All raw sequencing data generated in this study have been submitted to NCBI Sequence Read  
412 Archive (SRA) (<https://www.ncbi.nlm.nih.gov/sra>) under accession #PRJNA574176. Code and  
413 scripts can be found at [https://github.com/bowmanr/UV\\_mouse\\_melanoma](https://github.com/bowmanr/UV_mouse_melanoma).

414

#### 415 **ACKNOWLEDGMENTS**

416 This work was supported by the Melanoma Research Alliance (309669 to C.E.B.), Damon Runyon  
417 Foundation (38-16 to C.E.B; 22-17 to R.L.B.), Pelotonia (R.C.H., E.R.C.) and The National  
418 Institutes of Health (F31CA236418 to B.M.M.; R01 R01CA237213 to C.E.B.; P30CA016058 to  
419 The Ohio State University).

420

#### 421 **DISCLOSURE DECLARATION**

422 R.L.L. is on the supervisory board of Qiagen and is a scientific advisor to Imago, Mission Bio,  
423 Zentalis, Ajax, Auron, Prelude, C4 Therapeutics and Isoplexis. He receives research support from  
424 and consulted for Celgene and Roche and has consulted for Incyte, Janssen, Astellas, Morphosys  
425 and Novartis. He has received honoraria from Roche, Lilly and Amgen for invited lectures and  
426 from Gilead for grant reviews.

427 **REFERENCES**

- 428 Alexandrov LB. 2020. SigProfiler In *MATLAB Central File Exchange*.
- 429 Alexandrov LB, Jones PH, Wedge DC, Sale JE, Campbell PJ, Nik-Zainal S, Stratton MR. 2015. Clock-like  
430 mutational processes in human somatic cells. *Nature genetics* **47**: 1402-1407.
- 431 Alexandrov LB, Kim J, Haradhvala NJ, Huang MN, Tian Ng AW, Wu Y, Boot A, Covington KR, Gordenin DA,  
432 Bergstrom EN et al. 2020. The repertoire of mutational signatures in human cancer. *Nature* **578**:  
433 94-101.
- 434 Alexandrov LB, Nik-Zainal S, Wedge DC, Aparicio SA, Behjati S, Biankin AV, Bignell GR, Bolli N, Borg A,  
435 Borresen-Dale AL et al. 2013a. Signatures of mutational processes in human cancer. *Nature* **500**:  
436 415-421.
- 437 Alexandrov LB, Nik-Zainal S, Wedge DC, Campbell PJ, Stratton MR. 2013b. Deciphering signatures of  
438 mutational processes operative in human cancer. *Cell Rep* **3**: 246-259.
- 439 Banerjee SS, Harris M. 2000. Morphological and immunophenotypic variations in malignant melanoma.  
440 *Histopathology* **36**: 387-402.
- 441 Bishop JA, Wachsmuth RC, Harland M, Bataille V, Pinney E, Mac KP, Baglietto L, Cuzick J, Bishop DT.  
442 2000. Genotype/phenotype and penetrance studies in melanoma families with germline  
443 CDKN2A mutations. *The Journal of investigative dermatology* **114**: 28-33.
- 444 Blokzijl F, Janssen R, van Boxtel R, Cuppen E. 2018. MutationalPatterns: comprehensive genome-wide  
445 analysis of mutational processes. *Genome Med* **10**: 33.
- 446 Blum H. 1969. Quantitative aspects of cancer induction by ultraviolet light: including a revised model In:  
447 Urbach F (ed). *The Biologic Effects of Ultraviolet Radiation-with Emphasis on the Skin*. Pergamon  
448 Press: New York.
- 449 Bosenberg M, Muthusamy V, Curley DP, Wang Z, Hobbs C, Nelson B, Nogueira C, Horner JW, 2nd,  
450 Depinho R, Chin L. 2006. Characterization of melanocyte-specific inducible Cre recombinase  
451 transgenic mice. *Genesis* **44**: 262-267.
- 452 Burd CE, Liu W, Huynh MV, Waqas MA, Gillahan JE, Clark KS, Fu K, Martin BL, Jeck WR, Souroullas GP et  
453 al. 2014. Mutation-specific RAS oncogenicity explains NRAS codon 61 selection in melanoma.  
454 *Cancer discovery* **4**: 1418-1429.
- 455 Cadet J, Douki T. 2018. Formation of UV-induced DNA damage contributing to skin cancer development.  
456 *Photochem Photobiol Sci* **17**: 1816-1841.
- 457 Cadet J, Wagner JR. 2013. DNA base damage by reactive oxygen species, oxidizing agents, and UV  
458 radiation. *Cold Spring Harb Perspect Biol* **5**.
- 459 Cancer Genome Atlas N. 2015. Genomic Classification of Cutaneous Melanoma. *Cell* **161**: 1681-1696.
- 460 Chagani S, Wang R, Carpenter EL, Lohr CV, Ganguli-Indra G, Indra AK. 2017. Ablation of epidermal  
461 RXRalpha in cooperation with activated CDK4 and oncogenic NRAS generates spontaneous and  
462 acute neonatal UVB induced malignant metastatic melanomas. *BMC Cancer* **17**: 736.
- 463 Chang D, Shain AH. 2020. The landscape of driver mutations in cutaneous squamous cell carcinoma.  
464 *bioRxiv* doi:10.1101/2020.12.13.422581: 2020.2012.2013.422581.
- 465 Cibulskis K, Lawrence MS, Carter SL, Sivachenko A, Jaffe D, Sougnez C, Gabriel S, Meyerson M, Lander ES,  
466 Getz G. 2013. Sensitive detection of somatic point mutations in impure and heterogeneous  
467 cancer samples. *Nat Biotechnol* **31**: 213-219.
- 468 Dankort D, Curley DP, Cartledge RA, Nelson B, Karnezis AN, Damsky WE, Jr., You MJ, DePinho RA,  
469 McMahon M, Bosenberg M. 2009. Braf(V600E) cooperates with Pten loss to induce metastatic  
470 melanoma. *Nature genetics* **41**: 544-552.
- 471 Dankort D, Filenova E, Collado M, Serrano M, Jones K, McMahon M. 2007. A new mouse model to  
472 explore the initiation, progression, and therapy of BRAFV600E-induced lung tumors. *Genes &*  
473 *development* **21**: 379-384.

- 474 Diffey BL. 2002. Sources and measurement of ultraviolet radiation. *Methods* **28**: 4-13.
- 475 Dowdy JC, Czako EA, Stepp ME, Schlitt SC, Bender GR, Khan LU, Shinneman KD, Karos MG, Shepherd JG,  
476 Sayre RM. 2011. FDA-sunlamp recommended Maximum Timer Interval And Exposure Schedule:  
477 consensus ISO/CIE dose equivalence. *Health Phys* **101**: 227-232.
- 478 Gaddameedhi S, Kemp MG, Reardon JT, Shields JM, Smith-Roe SL, Kaufmann WK, Sancar A. 2010. Similar  
479 nucleotide excision repair capacity in melanocytes and melanoma cells. *Cancer Res* **70**: 4922-  
480 4930.
- 481 Gu Z, Eils R, Schlesner M. 2016. Complex heatmaps reveal patterns and correlations in multidimensional  
482 genomic data. *Bioinformatics* **32**: 2847-2849.
- 483 Hennessey RC, Holderbaum AM, Bonilla A, Delaney C, Gillahan JE, Tober KL, Oberyzyzn TM, Zippin JH,  
484 Burd CE. 2017. Ultraviolet radiation accelerates NRas-mutant melanomagenesis: A cooperative  
485 effect blocked by sunscreen. *Pigment cell & melanoma research* **30**: 477-487.
- 486 Hodis E, Watson IR, Kryukov GV, Arold ST, Imielinski M, Theurillat JP, Nickerson E, Auclair D, Li L, Place C  
487 et al. 2012. A landscape of driver mutations in melanoma. *Cell* **150**: 251-263.
- 488 Kasar S, Kim J, Improgo R, Tiao G, Polak P, Haradhvala N, Lawrence MS, Kiezun A, Fernandes SM, Bahl S  
489 et al. 2015. Whole-genome sequencing reveals activation-induced cytidine deaminase  
490 signatures during indolent chronic lymphocytic leukaemia evolution. *Nat Commun* **6**: 8866.
- 491 Khan AQ, Travers JB, Kemp MG. 2018. Roles of UVA radiation and DNA damage responses in melanoma  
492 pathogenesis. *Environ Mol Mutagen* **59**: 438-460.
- 493 Kim J, Mouw KW, Polak P, Braunstein LZ, Kamburov A, Kwiatkowski DJ, Rosenberg JE, Van Allen EM,  
494 D'Andrea A, Getz G. 2016. Somatic ERCC2 mutations are associated with a distinct genomic  
495 signature in urothelial tumors. *Nature genetics* **48**: 600-606.
- 496 Kim S, Scheffler K, Halpern AL, Bekritsky MA, Noh E, Kallberg M, Chen X, Kim Y, Beyter D, Krusche P et al.  
497 2018. Strelka2: fast and accurate calling of germline and somatic variants. *Nat Methods* **15**: 591-  
498 594.
- 499 Kitts A, Phan L, Ward MH, Holmes JB. 2013. The Database of Short Genetic Variation (dbSNP). In *The*  
500 *NCBI Handbook* National Center for Biotechnology Information, Bethesda (MD).
- 501 Koboldt DC, Zhang Q, Larson DE, Shen D, McLellan MD, Lin L, Miller CA, Mardis ER, Ding L, Wilson RK.  
502 2012. VarScan 2: somatic mutation and copy number alteration discovery in cancer by exome  
503 sequencing. *Genome research* **22**: 568-576.
- 504 Krauthammer M, Kong Y, Ha BH, Evans P, Bacchicocchi A, McCusker JP, Cheng E, Davis MJ, Goh G, Choi M  
505 et al. 2012. Exome sequencing identifies recurrent somatic RAC1 mutations in melanoma.  
506 *Nature genetics* **44**: 1006-1014.
- 507 Li H, Durbin R. 2009. Fast and accurate short read alignment with Burrows-Wheeler transform.  
508 *Bioinformatics* **25**: 1754-1760.
- 509 Luo C, Sheng J, Hu MG, Haluska FG, Cui R, Xu Z, Tschlis PN, Hu GF, Hinds PW. 2013. Loss of ARF  
510 sensitizes transgenic BRAFV600E mice to UV-induced melanoma via suppression of XPC. *Cancer*  
511 *Res* **73**: 4337-4348.
- 512 Mann MB, Black MA, Jones DJ, Ward JM, Yew CC, Newberg JY, Dupuy AJ, Rust AG, Bosenberg MW,  
513 McMahon M et al. 2015. Transposon mutagenesis identifies genetic drivers of Braf(V600E)  
514 melanoma. *Nature genetics* **47**: 486-495.
- 515 Marteijn JA, Lans H, Vermeulen W, Hoeijmakers JH. 2014. Understanding nucleotide excision repair and  
516 its roles in cancer and ageing. *Nat Rev Mol Cell Biol* **15**: 465-481.
- 517 McKenna A, Hanna M, Banks E, Sivachenko A, Cibulskis K, Kernysky A, Garimella K, Altshuler D, Gabriel  
518 S, Daly M et al. 2010. The Genome Analysis Toolkit: a MapReduce framework for analyzing next-  
519 generation DNA sequencing data. *Genome research* **20**: 1297-1303.
- 520 McLaren W, Gil L, Hunt SE, Riat HS, Ritchie GR, Thormann A, Flicek P, Cunningham F. 2016. The Ensembl  
521 Variant Effect Predictor. *Genome Biol* **17**: 122.

- 522 Mitchell DL, Jen J, Cleaver JE. 1992. Sequence specificity of cyclobutane pyrimidine dimers in DNA  
523 treated with solar (ultraviolet B) radiation. *Nucleic Acids Res* **20**: 225-229.
- 524 Monahan KB, Rozenberg GI, Krishnamurthy J, Johnson SM, Liu W, Bradford MK, Horner J, Depinho RA,  
525 Sharpless NE. 2010. Somatic p16(INK4a) loss accelerates melanomagenesis. *Oncogene* **29**: 5809-  
526 5817.
- 527 Moutton S, Fergelot P, Naudion S, Cordier MP, Sole G, Guerineau E, Hubert C, Rooryck C, Vuillaume ML,  
528 Houcinat N et al. 2016. Otopalatodigital spectrum disorders: refinement of the phenotypic and  
529 mutational spectrum. *J Hum Genet* **61**: 693-699.
- 530 Mukhopadhyay P, Ferguson B, Muller HK, Handoko HY, Walker GJ. 2016. Murine melanomas accelerated  
531 by a single UVR exposure carry photoproduct footprints but lack UV signature C>T mutations in  
532 critical genes. *Oncogene* **35**: 3342-3350.
- 533 Nakamura F, Osborn TM, Hartemink CA, Hartwig JH, Stossel TP. 2007. Structural basis of filamin A  
534 functions. *J Cell Biol* **179**: 1011-1025.
- 535 Ni TK, Landrette SF, Bjornson RD, Bosenberg MW, Xu T. 2013. Low-copy piggyBac transposon  
536 mutagenesis in mice identifies genes driving melanoma. *Proc Natl Acad Sci U S A* **110**: E3640-  
537 3649.
- 538 Noonan FP, Zaidi MR, Wolnicka-Glubisz A, Anver MR, Bahn J, Wielgus A, Cadet J, Douki T, Mouret S,  
539 Tucker MA et al. 2012. Melanoma induction by ultraviolet A but not ultraviolet B radiation  
540 requires melanin pigment. *Nat Commun* **3**: 884.
- 541 Page RC, Clark JG, Misra S. 2011. Structure of filamin A immunoglobulin-like repeat 10 from Homo  
542 sapiens. *Acta Crystallogr Sect F Struct Biol Cryst Commun* **67**: 871-876.
- 543 Perez-Guijarro E, Day CP, Merlino G, Zaidi MR. 2017. Genetically engineered mouse models of  
544 melanoma. *Cancer* **123**: 2089-2103.
- 545 Pfeifer GP, You YH, Besaratinia A. 2005. Mutations induced by ultraviolet light. *Mutat Res* **571**: 19-31.
- 546 Rad R, Cadinanos J, Rad L, Varela I, Strong A, Kriegl L, Constantino-Casas F, Eser S, Hieber M, Seidler B et  
547 al. 2013. A genetic progression model of Braf(V600E)-induced intestinal tumorigenesis reveals  
548 targets for therapeutic intervention. *Cancer cell* **24**: 15-29.
- 549 Robinson JT, Thorvaldsdottir H, Winckler W, Guttman M, Lander ES, Getz G, Mesirov JP. 2011.  
550 Integrative genomics viewer. *Nat Biotechnol* **29**: 24-26.
- 551 Roh MR, Eliades P, Gupta S, Tsao H. 2015. Genetics of melanocytic nevi. *Pigment cell & melanoma*  
552 *research* **28**: 661-672.
- 553 Sauvaigo S, Benkhiat M, Braisaz F, Girard J, Libert S, Mouret S, de Fraipont F, Asporid C, Bouquet F, Leccia  
554 M-T. 2020. DNA repair-based classification of melanoma cell lines reveals an effect of mutations  
555 in BRAF and NRAS driver genes on DNA repair capacity. *bioRxiv* doi:10.1101/2020.04.29.067900:  
556 2020.2004.2029.067900.
- 557 Savoy RM, Ghosh PM. 2013. The dual role of filamin A in cancer: can't live with (too much of) it, can't  
558 live without it. *Endocr Relat Cancer* **20**: R341-356.
- 559 Setlow RB. 1974. The wavelengths in sunlight effective in producing skin cancer: a theoretical analysis.  
560 *Proc Natl Acad Sci U S A* **71**: 3363-3366.
- 561 Shain AH, Garrido M, Botton T, Talevich E, Yeh I, Sanborn JZ, Chung J, Wang NJ, Kakavand H, Mann GJ et  
562 al. 2015a. Exome sequencing of desmoplastic melanoma identifies recurrent NFKBIE promoter  
563 mutations and diverse activating mutations in the MAPK pathway. *Nature genetics* **47**: 1194-  
564 1199.
- 565 Shain AH, Joseph NM, Yu R, Benhamida J, Liu S, Prow T, Ruben B, North J, Pincus L, Yeh I et al. 2018.  
566 Genomic and Transcriptomic Analysis Reveals Incremental Disruption of Key Signaling Pathways  
567 during Melanoma Evolution. *Cancer cell* **34**: 45-55 e44.

- 568 Shain AH, Yeh I, Kovalyshyn I, Sriharan A, Talevich E, Gagnon A, Dummer R, North J, Pincus L, Ruben B et  
569 al. 2015b. The Genetic Evolution of Melanoma from Precursor Lesions. *N Engl J Med* **373**: 1926-  
570 1936.
- 571 Smirnov P, Safikhani Z, El-Hachem N, Wang D, She A, Olsen C, Freeman M, Selby H, Gendoo DM,  
572 Grossmann P et al. 2016. PharmacoGx: an R package for analysis of large pharmacogenomic  
573 datasets. *Bioinformatics* **32**: 1244-1246.
- 574 Suphamongmee W, Nakamura F, Hartwig JH, Lehman W. 2012. Electron microscopy and 3D  
575 reconstruction reveals filamin Ig domain binding to F-actin. *J Mol Biol* **424**: 248-256.
- 576 Sutherland JC, Griffin KP. 1981. Absorption spectrum of DNA for wavelengths greater than 300 nm.  
577 *Radiat Res* **86**: 399-409.
- 578 Talevich E, Shain AH, Botton T, Bastian BC. 2016. CNVkit: Genome-Wide Copy Number Detection and  
579 Visualization from Targeted DNA Sequencing. *PLoS computational biology* **12**: e1004873.
- 580 Temprine K, Campbell NR, Huang R, Langdon EM, Simon-Vermot T, Mehta K, Clapp A, Chipman M, White  
581 RM. 2020. Regulation of the error-prone DNA polymerase Polkappa by oncogenic signaling and  
582 its contribution to drug resistance. *Sci Signal* **13**.
- 583 Trucco LD, Mundra PA, Garcia-Martinez P, Hogan K, Baenke F, Dhomen N, Pavet V, Marais R. 2020.  
584 Map3k1 Loss Cooperates with Braf(V600E) to Drive Melanomagenesis. *The Journal of*  
585 *investigative dermatology* doi:10.1016/j.jid.2020.05.085.
- 586 Trucco LD, Mundra PA, Hogan K, Garcia-Martinez P, Viros A, Mandal AK, Macagno N, Gaudy-Marqueste  
587 C, Allan D, Baenke F et al. 2019. Ultraviolet radiation-induced DNA damage is prognostic for  
588 outcome in melanoma. *Nat Med* **25**: 221-224.
- 589 Viros A, Sanchez-Laorden B, Pedersen M, Furney SJ, Rae J, Hogan K, Ejima S, Girotti MR, Cook M,  
590 Dhomen N et al. 2014. Ultraviolet radiation accelerates BRAF-driven melanomagenesis by  
591 targeting TP53. *Nature* **511**: 478-482.
- 592 Wang J, Perry CJ, Meeth K, Thakral D, Damsky W, Micevic G, Kaech S, Blenman K, Bosenberg M. 2017.  
593 UV-induced somatic mutations elicit a functional T cell response in the YUMMER1.7 mouse  
594 melanoma model. *Pigment cell & melanoma research* **30**: 428-435.
- 595 Yates AD, Achuthan P, Akanni W, Allen J, Allen J, Alvarez-Jarreta J, Amode MR, Armean IM, Azov AG,  
596 Bennett R et al. 2020. Ensembl 2020. *Nucleic Acids Res* **48**: D682-D688.
- 597 Zhang T, Dutton-Regester K, Brown KM, Hayward NK. 2016. The genomic landscape of cutaneous  
598 melanoma. *Pigment cell & melanoma research* **29**: 266-283.
- 599 Zloza A, Karolina Palucka A, Coussens LM, Gotwals PJ, Headley MB, Jaffee EM, Lund AW, Sharpe AH,  
600 Sznol M, Wainwright DA et al. 2017. Workshop on challenges, insights, and future directions for  
601 mouse and humanized models in cancer immunology and immunotherapy: a report from the  
602 associated programs of the 2016 annual meeting for the Society for Immunotherapy of cancer. *J*  
603 *Immunother Cancer* **5**: 77.

604

# Supplemental Materials

## UVB mutagenesis differs in NRAS- and BRAF-mutant mouse models of melanoma

Bowman and Hennessey, et al.

| <b>Contents</b>                | <b>Pages</b> |
|--------------------------------|--------------|
| Supplemental Figures S1-5..... | 2-6          |
| Supplemental Methods.....      | 7-8          |

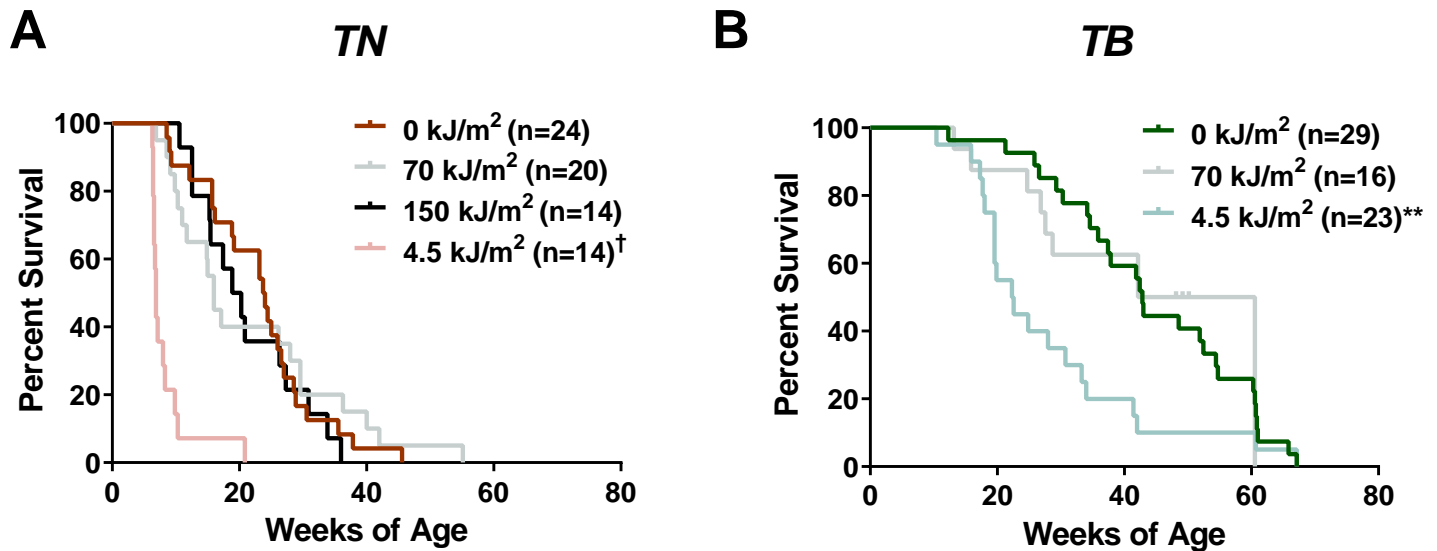

**Figure S1. Overall survival of *TN* and *TB* mice treated with No UV, UVA or UVB.** A&B, Kaplan-Meier curves depicting the overall survival rates of *TN* and *TB* mice treated on postnatal day three with a single dose of ambient light (0 kJ/m<sup>2</sup>), UVA or UVB. Mice were euthanized after meeting pre-determined exclusion criteria due to tumor burden or malaise. Statistical significance was determined by comparing values from control (0 kJ/m<sup>2</sup>) and UV-treated animals of the same genotype using Gehan-Breslow-Wilcoxon tests. † = p<0.0001, \*\* = p<0.01

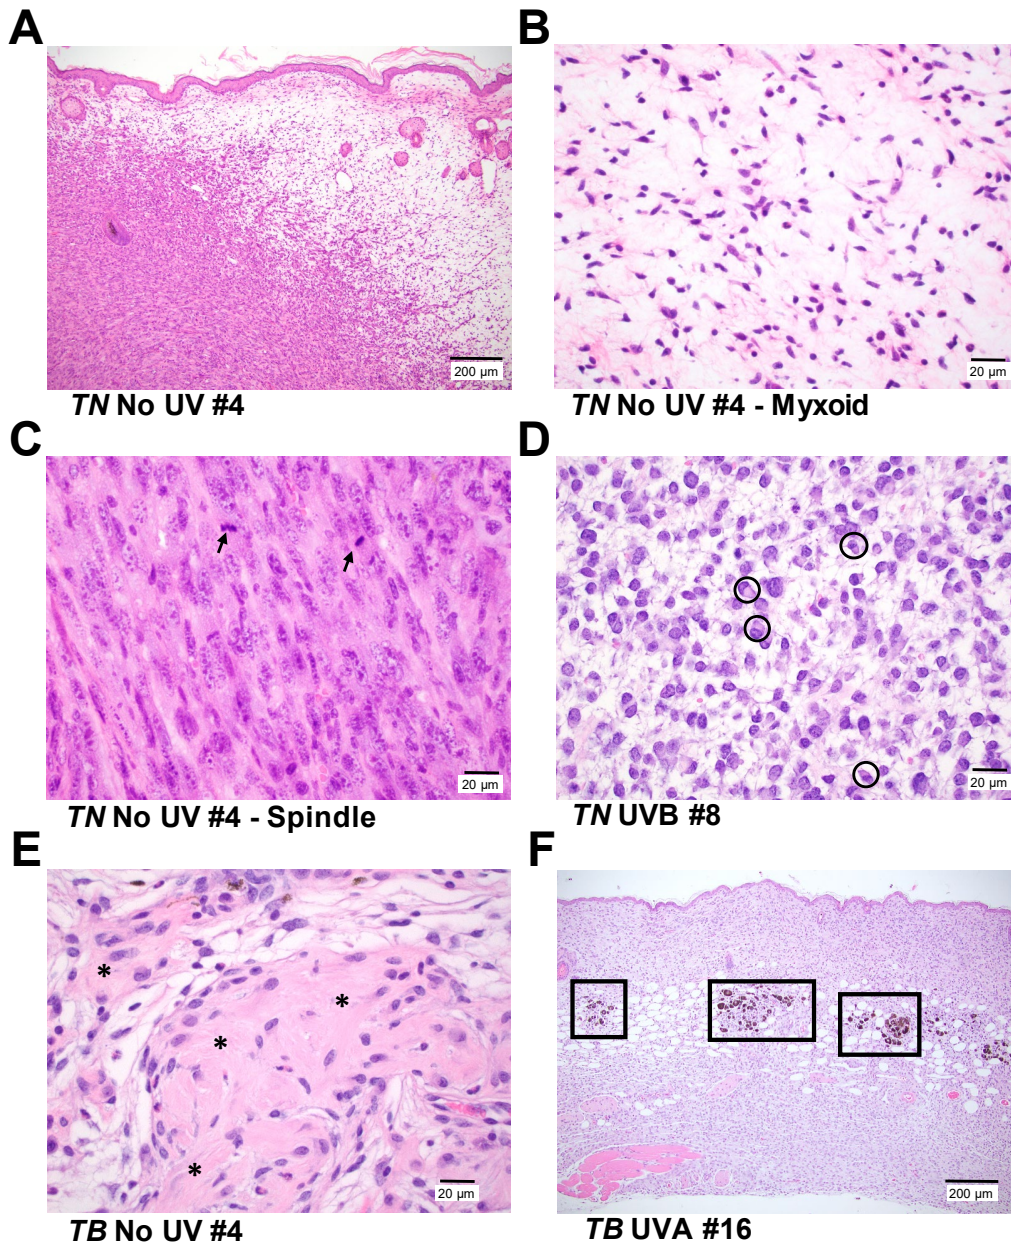

**Figure S2. Representative photomicrographs of cutaneous tumors from TN and TB mice. A,** *TN* and *TB* tumors, regardless of UV exposure history, contain variable proportions of spindle (left, cellular) and myxoid (right, spaces) morphologies. Bar = 200  $\mu$ m. **B&C,** Higher magnification images of the myxoid ('B', bar = 20  $\mu$ m) and spindle ('C', bar = 20  $\mu$ m) morphologies depicted in 'A'. Arrows = mitotic figures. **D,** Representative image of the neoplastic cells with plasmacytoid features seen in the majority of *TN* tumors evaluated. (circles; bar = 20  $\mu$ m). **E,** Half of the tumors in UVA-treated *TN* mice exhibited a fibroblastic phenotype with abundant collagen (indicated by \*; bar = 20  $\mu$ m). **F,** Tumor samples from *TB* mice contained areas of pigmentation, typically appearing as clusters of melanophages at the dermal-hypodermal interface (boxes, bar = 200  $\mu$ m). All images are of H&E stained tissues.



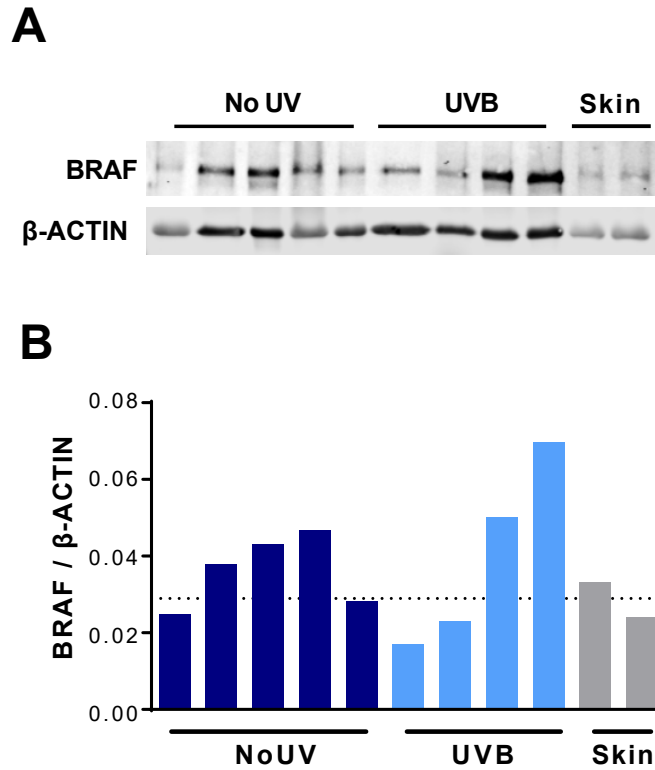

**Figure S3. Characterization of BRAF levels in *TB* tumors.** **A**, Immunoblot of BRAF and  $\beta$ -ACTIN expression in representative *TB* tumors and whole skin. Each row contains lysate from a single tumor or skin lysate. **B**, Quantification of the immunoblot shown in 'A'. The dotted line represents the average BRAF expression level in whole skin.

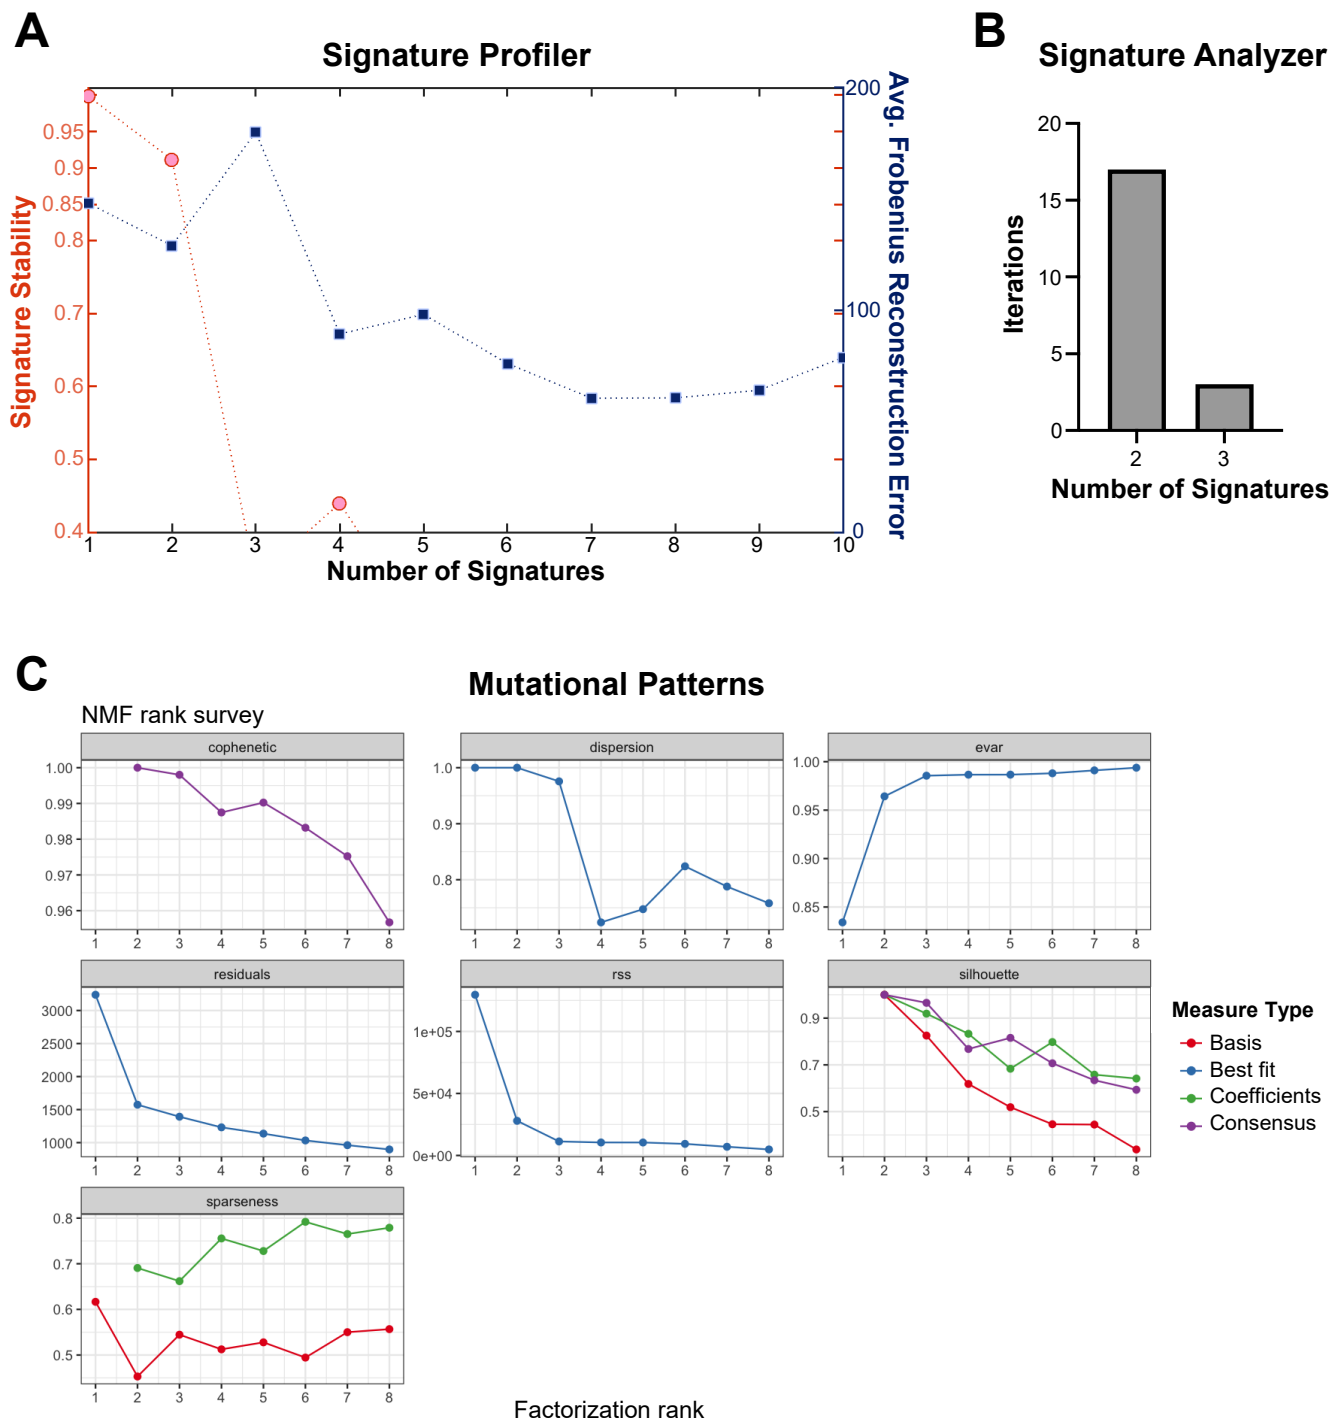

**Figure S4. Signature selection metrics.** **A**, The mean cosine distance representative of signature stability is plotted on the left y axis, and the average frobenius reconstruction error is plotted on the right y axis for each number of signatures tested by SignatureProfiler indicated on the x axis. **B**, The frequency of signatures identified by Signature Analyzer is shown, with 2 signatures being identified most frequently across the 20 iterations. See methods for details. **C**, Quality metrics produced for NMF estimate as used in MutationalPatterns. Two signatures were selected as the appropriate estimate based on the cophenetic score as described in the methods.

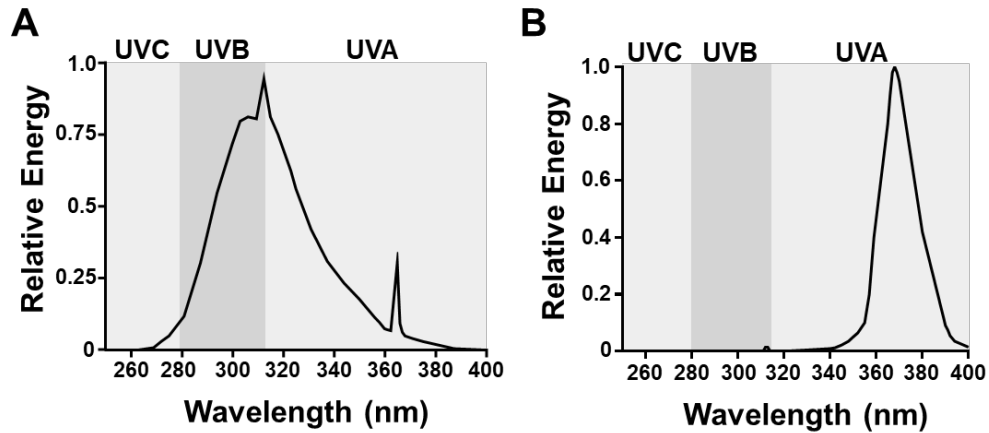

**Figure S5. UV light sources.** **A**, Shown is the relative amount of energy produced across the UV spectrum by our narrow band UVB, Spectronics EB-280C light source. **B**, Shown is the relative amount of energy produced across the UV spectrum by our narrow band UVAI (340-400 nm), BLE-8T365 light source.

## 60 **SUPPLEMENTAL METHODS**

### 61 **Tumor monitoring and processing**

62 Mice were randomly numbered following treatment and blindly monitored three times a week for  
63 tumor formation. Established melanomas were measured by calipers at least three times per  
64 week and tumor size (width × length (mm)) recorded until protocol exclusion criteria were met.  
65 Representative tumors were harvested from each cohort, fixed in 10% neutral buffered formalin,  
66 routinely processed and embedded in paraffin wax. Sections (4 μm) were stained with  
67 hematoxylin and eosin (H&E), and evaluated by a veterinary pathologist, certified by the American  
68 College of Veterinary Pathologists (KMDL), using an Olympus BX45 light microscope with  
69 attached DP25 digital camera (B&B Microscopes Limited, Pittsburgh, PA).

70

### 71 **Tumor immunoblotting**

72 Flash-frozen tumors were homogenized in PBS with Halt phosphatase inhibitor (Thermo  
73 Scientific) and protease inhibitor (Sigma) using the Precellys Evolution Homogenizer with Cryolys  
74 (Bertin Instruments). The preset elastic setting was used for homogenizing. Tumor homogenates  
75 were centrifuged to remove PBS and resuspended in RIPA buffer with phosphatase and protease  
76 inhibitors. Lysates were sonicated 2 x 10 seconds using a Branson digital sonifier at 10%  
77 amplitude. Samples were centrifuged at 15,000 rpm for 5 min at 4°C and supernatants collected  
78 and quantified by Bradford assay (BioRad). Samples (35 μg total) were blotted for BRAF (Santa  
79 Cruz sc-5284; 1:500) and β-Actin (Cell Signaling #3700; 1:1000) and imaged using a LI-COR  
80 Odyssey CLx system. Bands were quantified using Image Studio Version 5.2 software (LI-COR  
81 Biosciences).

82

### 83 **Sample preparation for whole exome sequencing**

84 Tumor DNA was isolated from flash frozen tissue using the Quick-DNA Miniprep Plus Kit (Zymo  
85 Research). Tissues were placed in 2 mL tubes containing 190 μL of diluted Zymo Solid Tissue

86 Buffer and 3.0 mm zirconium beads (Sigma Aldrich Cat# Z763902). Samples were then subjected  
87 to homogenization using the Precellys Evolution Homogenizer (Bertin Instruments) using the  
88 preset elastic setting: speed: 6,800 RPM, cycle: 4 X 30 sec, pause: 45 sec. Homogenized  
89 samples were then incubated in 20 mg/mL of Proteinase K overnight at 55°C before continuing  
90 with the Solid Tissues protocol as described for the Quick-DNA Miniprep Plus Kit. Control DNA  
91 was generated from toe clips or splenic tissue derived from ten representative *TN* and ten  
92 representative *TB* animals. These controls were then combined at an equal ratio and  
93 concentrated using the Genomic DNA Clean & Concentrator-10 kit (Zymo Research). The  
94 integrity and concentration of resulting genomic DNA was confirmed on an Agilent TapeStation.
